# Supplementary material
Source: publisher figshare collection journal article supplement (https://acs.figshare.com/ndownloader/files/14415068)
Supplement: Supplementary file 1 [file 14415068]

## Sheet: Imatinib MRM
peptide	Gene full name	Gene	F1_1	F1_2	FP	F2	FL	1/R1_1	1/R1_2	1/R2_1	1/R2_2	1/RL	1/RP	AVG	STD DEV
R.SLDVVGKIK.R [53, 61] (missed 1) (rank 1)	5'-AMP-activated protein kinase catalytic subunit alpha-2	PRKAA2			0.933718	1.07781				1.03892	0.974719			1.00629	0.0644035
R.VLPGKYLEEIATQMR.T [481, 495] (missed 1) (rank 2)	6-phosphofructokinase type C	PFKP			0.566243						0.887279		0.765278	0.7396	0.162051
R.NFGTKISAR.A [683, 691] (missed 1) (rank 1)	6-phosphofructokinase type C	PFKP			0.495784					0.844729	0.757344			0.699286	0.181573
K.FTTDDSICVLGISKR.N [710, 724] (missed 1) (rank 4)	6-phosphofructokinase type C	PFKP			0.498567				0.745726		0.861728			0.702007	0.185486
R.NVIFQPVAELKK.Q [725, 736] (missed 1) (rank 3)	6-phosphofructokinase type C	PFKP			0.498084					0.786145	0.813084			0.699104	0.174609
R.WCGEDVAVKIFSSR.D [213, 226] (missed 1)	Isoform 1 of Activin receptor type-1C	ALK7			1.07872					1.24339	0.895238			1.07245	0.174159
R.TVAVKVQHPK.V [171, 180] (missed 1)	Uncharacterized aarF domain-containing protein kinase 5	ADVCK1			1.04					0.854701	1.38889			1.09453	0.271237
K.IIFVVGGPGSGKGTQCEK.I [9, 26] (missed 1) (rank 1)	Adenylate kinase isoenzyme 1	AK1	1.41787		0.79234	1.05447			1.47243	0.953734	0.981621		1.01119	1.09766	0.251572
K.ATVFLNPAACKGK.A [62, 74] (missed 1) (rank 1)	Isoform 1 of Acylglycerol kinase, mitochondrial	AGK	1.17	0.82	0.96				1.36986		0.529101	1.0101		0.976511	0.289218
K.TDYEGQAKK.L [99, 107] (missed 1) (rank 2)	Isoform 1 of Acylglycerol kinase, mitochondrial	AGK	0.83	0.69	1.22					0.869565	0.862069		1.19048	0.943685	0.212928
R.KAGHHQTAYNALLNAGESR.L [1932, 1950] (missed 1) (rank 2)	Isoform 1 of Serine/threonine-protein kinase ATR	ATR			1.75765	0.734354				1.62148	1.25444		0.913987	1.25638	0.439977
R.IHISQEDNVANKQTLASYR.S [282, 300] (missed 1)	Isoform 2 of Bromodomain adjacent to zinc finger domain protein 1A	BAZ1A			0.82					0.398406			0.613497	0.610634	0.210811
R.QLLDDHKDVVTLLAEGLR.E [156, 173] (missed 1) (rank 2)	Branched chain ketoacid dehydrogenase kinase, isoform CRA_a	BCKDK	0.95							0.862069	0.980392			0.93082	0.0614491
R.LCEHKYGNAPR.V [240, 250] (missed 1) (rank 1)	Branched chain ketoacid dehydrogenase kinase, isoform CRA_a	BCKDK	0.91		0.83	0.84				0.699301	0.680272		0.943396	0.817162	0.107583
R.SFPFVSKTLGVDLVALATR.V [1221, 1239] (missed 1) (rank 4)	CAD protein	CAD	0.61194	0.656716	0.597015	0.656716	0.666667			0.556787	0.723022	0.612805		0.635208	0.0510993
K.AMLSTGFKIPK.K [1301, 1311] (missed 1) (rank 1)	CAD protein	CAD			0.85	0.6				0.324675	0.704225		0.37594	0.570968	0.220882
K.NKSELLPTVR.L [1323, 1332] (missed 1) (rank 2)	CAD protein	CAD	0.4						0.714286	0.35461	0.4		0.662252	0.506229	0.168217
K.LVAIKCIAK.E [44, 52] (missed 1) (rank 1)	Calcium/calmodulin-dependent protein kinase type 1	CAMK1	0.75						0.769231	0.456621		0.510204	0.537634	0.604738	0.144514
R.DLKPENLLYYSLDEDSK.I [140, 156] (rank 2)	Calcium/calmodulin-dependent protein kinase type 1	CAMK1			0.7			0.235294		0.483092	0.909091			0.581869	0.289194
K.IADFGLSKIVEHQVLMK.T [182, 198] (missed 1) (rank 2)	Calcium/calmodulin-dependent protein kinase type IV	CAMK4			0.955263	1.025			0.890973	1.11437				0.996401	0.0958155
R.DLKPENLLIDQQGYLQVTDFGFAK.R [175, 198] (rank 1)	CAMP-dependent protein kinase CatalytiC subunit gamma	PRKACG	0.74		0.87					0.505051			0.775194	0.722561	0.155052
R.DIKPDNFLMGTGR.H [135, 147]	Casein kinase I isoform alpha-like	CSNK1A1L			1.37	0.98			1.08696	0.505051	0.645161			0.917434	0.347009
R.IAKVLGTEELYGYLK.K [245, 259] (missed 1) (rank 4)	Casein kinase II subunit alpha'	CSNK2A2	0.81							0.8	0.78125			0.797083	0.0145952
K.VLGTEELYGYLKK.Y [248, 260] (missed 1) (rank 2)	Casein kinase II subunit alpha'	CSNK2A2	0.814341		0.921895			0.950122	0.903935		0.891553		1.01693	0.916462	0.0670252
R.VLQEGKAR.G [521, 528] (missed 1) (rank 1)	Cation-independent mannose-6-phosphate receptor	IGF2R			0.568272	1.23599			1.14144	0.790886	0.787935		1.27209	0.966102	0.28911
R.AGFTAAYSEK.G [1535, 1544] (rank 2)	Cation-independent mannose-6-phosphate receptor	IGF2R			0.698925	1.08602			1.45313	0.678832	0.726563		1.47619	1.01994	0.375674
K.LKPANILVMGEGPER.G [27, 41] (rank 1)	CDK19 cDNA FLJ50029, highly similar to Cell division cycle 2-like protein kinase 6	CDK19			0.761972	1.29813				1.0057	0.81757		1.38422	1.05352	0.279356
R.LPVIDPESGNTLYILTHKR.I [161, 179] (missed 1) (rank 1)	cDNA FLJ40287 fis, clone TESTI2027909, highly similar to 5'-AMP-ACTIVATED PROTEIN KINASE, GAMMA-1 SUBUNIT	PRKAG1	1.11064	1.04681	0.657447	0.951064			1.41141	0.885122	0.900383	0.63172	1.42424	1.00209	0.283311
K.ASKELQSVEQEVR.W [171, 183] (missed 1) (rank 3)	cDNA FLJ56153, highly similar to Homo sapiens transforming growth factor beta regulator 4 (TBRG4), transcript variant 1, mRNA	TBRG4			0.62	1.09			1.49254	0.719424				0.98049	0.396776
R.KVTPLQK.E [498, 504] (missed 1) (rank 2)	cDNA FLJ56153, highly similar to Homo sapiens transforming growth factor beta regulator 4 (TBRG4), transcript variant 1, mRNA	TBRG4			0.64	0.07			0.483092	0.319489	0.266667			0.355849	0.216747
R.DTQTDEIVALKK.V [57, 68] (missed 1)	cDNA FLJ59580, highly similar to Cell division protein kinase 10	CDK10	0.46					0.806452	0.787402	0.27248	0.456621	0.480769	0.746269	0.572856	0.206406
R.DLKPQNLLINEK.G [312, 323] (rank 1)	Cell division protein kinase 17	CDK17	0.72		1	1.38		1.1236	0.925926	0.684932	0.892857		0.657895	0.923151	0.246142
K.LTGEVVALKK.I [24, 33] (missed 1) (rank 1)	Cell division protein kinase 2	CDK2	1.3237			0.821405				0.794471	0.88598	0.829521	0.711018	0.89435	0.217956
R.DLKPQNLLINTEGAIK.L [126, 141] (rank 2)	Cell division protein kinase 2	CDK2	1.23	1.58	1.03	1	0.91	1.04167	0.78125	0.763359	0.735294	0.591716	0.694444	0.941612	0.282226
R.ADQQYECVAEIGEGAYGKVFK.A [8, 28] (missed 1) (rank 2)	Cell division protein kinase 4	BCL1			0.57			0.840336		0.478469	0.471698			0.590126	0.172726
R.DLKPQNILVTSSGQIK.L [144, 159] (rank 1)	Cell division protein kinase 4	BCL1	0.9		0.82	0.79				0.364964	0.438596	0.352113	0.361011	0.575241	0.24835
K.FVTDIDELGKDLLLK.C [264, 278] (missed 1) (rank 3)	Cell division protein kinase 4	BCL1	0.617849		0.659039	0.782609		0.585007	0.822976	0.933761	1.1292	1.1292	0.851852	0.83461	0.202066
R.EICLLKELK.H [50, 58] (missed 1) (rank 2)	Cell division protein kinase 5	CABLES1	0.85	1.35	1.5			0.549451	0.813008				0.763359	0.97097	0.369839
R.DLKPQNLLINR.N [125, 135] (rank 1)	Cell division protein kinase 5	CABLES1	0.48	0.88	0.85			0.934579	0.746269	0.934579	0.970874	0.970874	0.70922	0.830711	0.161462
R.DLKPENILVTSGGTVK.L [139, 154] (rank 1)	Cell division protein kinase 6	CCND1	0.638101		0.571517	0.638101		0.914834		0.715168	0.974174	0.557964	0.800988	0.726356	0.156087
R.DLKPNNLLLDENGVLK.L [136, 151] (rank 1)	Cell division protein kinase 7	CDK7/CAK	1.11	1.06	0.83	1.11		0.862069	0.854701	0.714286	0.763359	0.724638	0.653595	0.868265	0.168901
K.IGQGTFGEVFKAR.H [24, 36] (missed 1) (rank 2)	Cell division protein kinase 9	CDK9/TAK			1.03	1.59		0.847458	1.13636				0.833333	1.08743	0.308391
R.EIKILQLLK.H [65, 73] (missed 1) (rank 3)	Cell division protein kinase 9	CDK9/TAK	1.26		0.88	1.15		0.787402	0.909091					0.997298	0.1987
R.DMKAANVLITR.D [148, 158] (missed 1) (rank 1)	Cell division protein kinase 9	CDK9/TAK	0.87		0.76	1.15		1.1236	1.17647	0.534759	0.636943	0.526316		0.84726	0.275011
R.HVAVKIVK.N [186, 193] (missed 1)	CLK3 Isoform 1 of Dual specificity protein kinase CLK1	CLK1			0.58087					0.694864	1.02041			0.765381	0.228096
R.VALKIIK.N [189, 195] (missed 1)	CLK3 Isoform 1 of Dual specificity protein kinase CLK2	CLK2				1.24			0.980392				0.671141	0.963844	0.28479
K.FQVVAIEGLDATGKTTVTQSVADSLK.A [251, 276] (missed 1) (rank 1)	CMPK2 UMP-CMP kinase isoform a	CMPK2				0.944554				0.90991	1.04555			0.966671	0.0704721
R.IKNCLNPQFSK.T [50, 60] (missed 1) (rank 1)	Copine-3	CPNE3			0.619318	1.32955			1.49153	0.785714	0.838095		1.09317	1.02623	0.338172
R.AIEKLAVEALSSLDGDLAGR.Y [152, 171] (missed 1) (rank 1)	Creatine kinase B-type	CKB	0.562895	0.878805	0.672028	1.29236	1.21195		1.2708	0.829048	0.756957	0.833014	1.15298	0.946084	0.264062
R.FCTGLTQIETLFKSK.D [252, 266] (missed 1) (rank 2)	Creatine kinase B-type	CKB	0.745902		0.631148	1.27664			0.959371	0.766091	0.807501		1.31536	0.928859	0.269133
K.HNNHMAKVLTLELYK.K [25, 39] (missed 1) (rank 1)	Creatine kinase M-type	CKMM				1.03658			1.03062	1.00691				1.02471	0.0156942
R.TLYDFPGNDAEDLPFKK.G [129, 145] (missed 1) (rank 3)	Crk-like protein	CRKL			0.60989	1.07692			1.10976	0.730924	0.957895			0.897078	0.218723
R.VGMIPVPYVEKLVR.S [169, 182] (missed 1) (rank 2)	Crk-like protein	CRKL	0.605374		0.816961	1.23426			1.40614	0.603343	0.711895		1.75405	1.01886	0.450093
R.VPCAYDKTALALEVGDIVK.V [246, 264] (missed 1) (rank 1)	Crk-like protein	CRKL	0.83	0.91	0.98				1.06383	0.970874	0.952381			0.951181	0.0778335
K.VLGTEDLYDYIDKYNIELDPR.F [247, 267] (missed 1) (rank 3)	CSNK2A1 CSNK2A1 protein	CSNK2A1			0.847208	1.6059			1.25529	1.29645	0.909004		1.13789	1.17529	0.278011
R.DTGQIVAIKK.F [25, 34] (missed 1)	cyclin-dependent kinase-like 1	CDKL1	0.79		0.55					0.431034	0.549451	0.714286	0.60241	0.606197	0.128484
R.DLKPANLLISASGQLK.I [126, 141] (rank 1)	Cyclin-dependent protein kinase H	CDK20	0.53			0.94		1.28205		1.16279	1.08696			1.00036	0.290738
R.DLKVENLLLSNQGTIK.L [172, 187] (missed 1) (rank 1)	Cyclin-G-associated kinase	GAK			0.67	0.77				0.645161	0.47619			0.640338	0.122011
R.GLNPKILFSSR.E [728, 738] (missed 1) (rank 2)	Cyclin-G-associated kinase	GAK			0.674505	0.717822				0.734545	0.816162		0.979394	0.784486	0.120443
K.GQYDVAVKMIK.E [437, 447] (missed 1)	Cytoplasmic tyrosine-protein kinase BMX	BMX	1.23		1.26	1.73			0.657895		0.980392			1.17166	0.394807
K.ISIEGNIAAGKSTFVNILK.Q [23, 41] (missed 1) (rank 1)	Deoxycytidine kinase	DCK			0.92					0.793651	0.689655		0.869565	0.818218	0.100213
K.DAEKPVLFFER.S [117, 127] (rank 2)	Deoxycytidine kinase	DCK			0.82					0.531915	0.699301			0.683739	0.144672
K.GHPLLVAVK.I [646, 654]	Discoidin domain-containing receptor 1	DDR1				1.04			0.934579			0.934579		0.96972	0.0608646
R.KEVAALR.E [610, 616] (missed 1) (rank 1)	DMPK2 Isoform 10 of Myotonin-protein kinase2	DMPK2	0.684211	0.526316	0.649123		0.631579			0.780822	0.814286	0.5		0.655191	0.117774
K.KLEELELDEQQR.K [35, 46] (missed 1) (rank 2)	Dual specificity mitogen-activated protein kinase kinase 1	MAP2K1			1	1.11			0.735294	0.787402				0.908174	0.176672
K.LTHTDLKPENILFVK.S [281, 295] (rank 1)	Dual specificity protein kinase CLK4	CLK4	0.96	0.52	0.71	0.97			0.862069	0.892857	0.943396	0.952381	0.8	0.845634	0.14938
K.TVAIKTLK.D [651, 658] (missed 1)	Ephrin type-A receptor 1	EPHA1		0.57						0.581395	0.411523		0.398406	0.490331	0.0988277
K.AKQEADEEK.H [578, 586] (missed 1) (rank 1)	Ephrin type-A receptor 4	EPHA4			0.580495	1.03096			1.0303	0.644711	0.882514		1.36287	0.921975	0.287417
R.ELPVAIKTLK.V [701, 710] (missed 1)	EPHA5 Ephrin receptor	EPHA5/BSK			0.806202	1.48837		1.075	0.848684	0.767857	0.80625	1.34375		1.01944	0.291986
R.DVAVAIKTLK.V [658, 667] (missed 1)	Isoform 1 of Ephrin type-A receptor 7	EPHA7			0.927597	0.9234				0.869526	1.00105			0.930393	0.0540186
R.DVPVAIKALK.A [660, 669] (missed 1)	Isoform 1 of Ephrin type-A receptor 8	EPHA8			0.610199				0.892754			0.787605		0.763519	0.142809
R.FLEENSSDPTYTSSLGGKIPIR.W [763, 784] (missed 1) (rank 1)	EPHB4 Ephrin receptor	EPHB4	0.9	1.19	0.73	0.84		1.44928	1.21951	1.38889	1.42857	0.884956	0.990099	1.10213	0.266368
K.EVPVAIKTLK.A [639, 648] (missed 1) (rank 2)	Ephrin type-A receptor 2	EPHA2			0.709529	1.05396			1.19972	0.776292	0.756076		1.26232	0.95965	0.243212
K.FADIVSILDKLIR.A [863, 875] (missed 1) (rank 3)	Ephrin type-A receptor 2	EPHA2	1.17754			0.722307			1.18525			0.795894		0.970248	0.245677
R.EVFVAIKTLK.V [658, 667] (missed 1)	Ephrin type-B receptor 3	EPHB3			1.1831	0.802817				1.12698	1.07576	1.02899	0.816092	1.00562	0.160464
K.YIKYNSNSGFVR.D [235, 246] (missed 1) (rank 1)	Eukaryotic elongation factor 2 kinase	EEF2K			0.97				1	0.671141			0.636943	0.819521	0.191979
R.DLKPSNIFFTMDDVVK.V [936, 951] (rank 1)	Eukaryotic translation initiation factor 2-alpha kinase 3	EIF2AK3	0.88		0.63				0.60241	0.666667	0.763359			0.708487	0.113566
R.LIKDDEYNPCQGSKFPIK.W [405, 422] (missed 2) (rank 1)	FGR Tyrosine-protein kinase Fgr	FGR			0.57				0.806452	0.636943	0.505051	0.518135	0.961538	0.666353	0.181603
R.DLKPENILLDDYGHIR.I [310, 325] (rank 1)	G protein-coupled receptor kinase 5	GRK5			0.83					0.520833	0.549451			0.633428	0.170837
R.DLKPENILLDDHGHIR.I [310, 325] (rank 1)	G protein-coupled receptor kinase 6	GRK6			0.553525	0.804178				0.681495	0.851111			0.722577	0.133474
R.KDGLVSLLTTSEGADEPQR.L [98, 116] (missed 1) (rank 1)	cDNA FLJ56840, highly similar to Galactokinase	GALK1	0.79	1.4	1.25	0.8			0.943396	0.961538		1.17647		1.04592	0.233691
R.SLETSLVPLSDPKLAVLITNSNVR.H [234, 257] (missed 1) (rank 2)	cDNA FLJ56840, highly similar to Galactokinase	GALK1				1.0567			0.858251	1.08661	1.16571			1.04182	0.130733
R.DIKPQNLLVDPDTAVLK.L [243, 259] (rank 1)	Glycogen synthase kinase-3 alpha	GSK3A			0.74		0.87	0.70922		0.456621	0.568182		0.581395	0.654236	0.147442
R.DLKPANILLDEHGHVR.I [316, 331] (rank 1)	GRK2 Isoform GRK6A of G protein-coupled receptor kinase 2	BARK/GRK2			0.599769	1.08997			1.13333	0.7225	0.958011			0.900716	0.232131
R.TLAGKLVEQR.K [1050, 1059] (missed 1) (rank 1)	IKBKAP Elongator complex protein 1	IKBKAP			0.762712	1.04237			1.87302	0.771242	0.819444		0.874074	1.02381	0.428403
R.DLKPENIVLQDVGGK.I [143, 157] (rank 1)	Inhibitor of nuclear factor kappa-B kinase subunit alpha	CHUK			0.77	0.78				0.735294	0.813008			0.774576	0.0319919
R.DLKPENIVLQQGEQR.L [144, 158] (rank 1)	Inhibitor of nuclear factor kappa-B kinase subunit beta	IKBKB	0.61		0.42					0.970874	1.0101		0.662252	0.734645	0.250728
K.YPCVLDLKMGTR.Q [218, 229] (missed 1) (rank 2)	Inositol hexakisphosphate kinase 1	IP6K1			1.12	0.87					1.0101			1.00003	0.125304
R.NKYYGR.G [276, 281] (missed 1) (rank 1)	Inositol hexakisphosphate kinase 1	IP6K1	1.01		1	1.24			0.877193			0.729927		0.971424	0.188174
K.DKVGILQHPDGTVLK.Q [60, 74] (missed 1) (rank 1)	Inositol polyphosphate multikinase	IPMK			0.83	0.84				0.671141	0.917431			0.814643	0.103339
K.SLLQEAQNNLKIFK.N [198, 211] (missed 1) (rank 1)	Inositol-pentakisphosphate 2-kinase	IPPK	1.33333			0.45614			0.919355	0.890625				0.899863	0.358353
R.GLEAGEESTPVALKTVNELASPR.E [999, 1021] (missed 1)	INSRR Insulin receptor-related protein	INSRR			0.77				0.714286		0.546448		0.719424	0.68754	0.0973628
R.VAIKTVNEAASMR.E [1029, 1041] (missed 1) (rank 1)	Insulin-like growth factor 1 receptor	IGF1R	1.18389		1.01709				1.26051		1.10224	0.91037		1.09482	0.137392
R.ISMADVKFSFQCPGR.M [334, 348] (missed 1) (rank 1)	Integrin-linked protein kinase	ILK			0.89	0.96			0.869565	0.806452	0.8		0.925926	0.875324	0.063869
R.DLKPSNIFLVDTK.Q [413, 425] (rank 1)	Interferon-induced, double-stranded RNA-activated protein kinase	EIF2AK2	0.95		0.94				0.854701	0.537634	0.653595	0.684932	0.649351	0.752887	0.161122
K.IGDFGLVTSLKNDGK.R [429, 443] (missed 1) (rank 2)	Interferon-induced, double-stranded RNA-activated protein kinase	EIF2AK2			0.794078				1.37593	0.721359	0.820994		1.14308	0.971087	0.278253
K.GYVNNTTVAVKK.L [202, 213] (missed 1) (rank 2)	Interleukin-1 receptor-associated kinase 4	IRAK4				1.31			1.21951		0.649351		0.862069	1.01023	0.308678
R.DIKSANILLDEAFTAK.I [310, 325] (missed 1) (rank 1)	Interleukin-1 receptor-associated kinase 4	IRAK4	0.76		0.92	1.13			1.1236	0.892857	1.03093		1.03093	0.984044	0.134031
R.NTVYAVKR.L [232, 239] (missed 1)	interleukin-1 receptor-associated kinase 1 isoform 3	IRAK	0.36		0.62					0.729927	0.75188		0.543478	0.601057	0.159011
K.VLKGEIPWSQELRPEAK.N [492, 508] (missed 1) (rank 2)	Isoform 1 of 3-phosphoinositide-dependent protein kinase 1	PDPK1				0.798529				0.871795	0.948396			0.872907	0.0749395
K.LLAHQKPPK.E [386, 394] (rank 2)	Isoform 1 of 6-phosphofructokinase, liver type	PFKL	0.74		0.87				0.625	0.787402	0.900901		0.684932	0.768039	0.106373
R.TLPKGQLESIVENIR.I [470, 484] (missed 1) (rank 1)	Isoform 1 of 6-phosphofructokinase, liver type	PFKL	0.91	0.89				0.540541			0.458716	0.387597	0.529101	0.619326	0.22432
K.GKGITMLEEIK.V [254, 264] (missed 1) (rank 1)	Isoform 1 of Alpha-type platelet-derived growth factor receptor	PDGFRA			1.21	1.44			0.892857	0.862069	1.25		1.16279	1.13629	0.221703
R.VTKVAVK.M [507, 513] (missed 1)	Isoform 1 of Basic fibroblast growth factor receptor 1	FGFR1			0.98	1.22			1.11111		1.06383		0.826446	1.04028	0.147673
R.QPVDAVKLGLPDYHK.I [100, 114] (missed 1) (rank 1)	Isoform 1 of Bromodomain-containing protein 2	BRD2			0.847059	0.917647			0.928962	0.944444	0.885417		1.0303	0.925639	0.0619287
K.TPVAPKK.D [1185, 1191] (missed 1)	Isoform 1 of Bromodomain-containing protein 4	BRD4				1.31116				1.25298	1.12267			1.22894	0.0965208
R.DIKPSNLLLGDDGHVK.I [274, 289] (rank 1)	Isoform 1 of Calcium/calmodulin-dependent protein kinase kinase 1	CAMKK1			0.79	0.77				0.510204	0.47619		0.4329	0.595859	0.170462
K.KGSEVESVK.E [8, 16] (missed 1) (rank 1)	Isoform 1 of cAMP-dependent protein kinase catalytic subunit beta	PRKACB	0.739792	0.682146	0.56205			1.14064	0.84966		0.509588			0.747312	0.228175
R.DIKPDNFLMGIGR.H [135, 147] (rank 1)	Isoform 1 of Casein kinase I isoform alpha	CSNK1A1	1.2	1.92	0.75	1.23		1.5625	1.08696	0.529101	0.598802	0.714286	0.714286	1.03059	0.454897
K.DTGELVALKK.V [747, 756] (missed 1)	Isoform 1 of Cell division protein kinase 12	CDK12			0.73	1.58		0.943396						1.08447	0.442211
R.DIKCSNILLNNSGQIK.L [858, 873] (missed 1) (rank 1)	Isoform 1 of Cell division protein kinase 12	CDK12				1.02			0.970874		1.06383			1.01823	0.0465031
R.DLKPQNLLISDTGELK.L [255, 270] (rank 1)	Isoform 1 of Cell division protein kinase 14	CDK14	0.75	0.79	1.53				1.36986		0.526316		0.649351	0.935922	0.411581
R.DIKPENILVDR.T [220, 230] (rank 2)	Isoform 1 of Citron Rho-interacting kinase	CIT/STK21	0.38		0.64	0.82		0.680272	0.558659	0.436681	0.44843	0.403226	0.497512	0.540531	0.147307
R.DIKPENILVSQSGITK.L [124, 139] (rank 1)	Isoform 1 of Cyclin-dependent kinase-like 3	CDKL3			0.722951					0.84022	0.92006			0.827744	0.0991453
K.KAALSALESFLK.Q [309, 320] (missed 1) (rank 1)	Isoform 1 of DNA-dependent protein kinase catalytic subunit	PRKDC			0.452489					0.803636	0.837121		0.902041	0.748822	0.201735
K.FYQGFLFSEKPEK.N [1960, 1972] (rank 4)	Isoform 1 of DNA-dependent protein kinase catalytic subunit	PRKDC			0.77					0.606061	0.662252		0.671141	0.677363	0.0681486
R.EHPFLVKGGEDLR.Q [3746, 3758] (missed 1) (rank 3)	Isoform 1 of DNA-dependent protein kinase catalytic subunit	PRKDC				0.610365				0.807752	0.868333			0.76215	0.134895
K.KGGSWIQEINVAEK.N [4022, 4035] (missed 1) (rank 2)	Isoform 1 of DNA-dependent protein kinase catalytic subunit	PRKDC				0.728013				0.921922	0.84225			0.830728	0.0974665
R.HAQSGTIMAVKR.I [53, 64] (missed 1) (rank 3)	Isoform 1 of Dual specificity mitogen-activated protein kinase kinase 3	MAP2K3			1.02	1.3				0.806452	0.735294		1.26582	1.02551	0.257554
R.DVKPSNVLINK.E [160, 170] (rank 1)	Isoform 1 of Dual specificity mitogen-activated protein kinase kinase 3	MAP2K3			1	1.16			0.854701	0.892857	0.826446			0.946801	0.136163
R.DVKPSNVLINALGQVK.M [178, 193] (rank 1)	Isoform 1 of Dual specificity mitogen-activated protein kinase kinase 6	MAP2K6/MEK6			0.97					1.14943	1.0101			1.04318	0.0941743
R.DVKPSNILLDER.G [242, 253] (rank 1)	Isoform 1 of Dual specificity mitogen-activated protein kinase kinase 7	MAP2K7	0.73	0.93	0.67			0.645161	0.540541	0.502513	0.558659	0.613497	0.41841	0.623198	0.14824
K.SQVALKIIR.N [180, 188] (missed 1)	Isoform 1 of Dual specificity protein kinase CLK3	CLK3	0.934483		0.706034	1.21638		0.99742	0.883473	1.0052	0.895062	1.19711	0.942323	0.975276	0.157651
R.EIFVAIKTLK.S [646, 655] (missed 1) (rank 2)	Isoform 1 of Ephrin type-B receptor 2	EPHB2	0.722222			1.27778			0.9		1.125			1.00625	0.244806
K.IPVAIKELR.E [739, 747] (missed 1) (rank 1)	Isoform 1 of Epidermal growth factor receptor	EGFR			1.30105	1.02947			0.953815	1.13909	1.0771		1.22739	1.12132	0.128312
R.YLNEFEELAILGKGGYGR.V [162, 179] (missed 1) (rank 1)	Isoform 1 of Eukaryotic translation initiation factor 2-alpha kinase 1	EIF2AK1	1.39		1.22			1.23457	1.26582	0.763359	0.952381	1.0101	1.06383	1.11251	0.202613
R.DLKPVNIFLDSDDHVK.I [847, 862] (rank 1)	Isoform 1 of Eukaryotic translation initiation factor 2-alpha kinase 4	EIF2AK4	0.64	0.47	0.71					0.645161	0.719424		0.806452	0.665173	0.113172
K.KAAEQTAAR.E [741, 749] (missed 1) (rank 4)	Isoform 1 of Exosome component 10	EXOSC10	0.27						0.609756	0.469484	0.729927			0.519792	0.197634
K.EAVTVAVKMLK.D [509, 519] (missed 1)	Isoform 1 of fibroblast growth factor receptor 2	FGFR2			1.01	1.18		1.40845	1.04167	0.699301	1.06383	1	1.0989	1.06277	0.197782
R.AEAFGMDPARPDQASTVAVKMLK.D [483, 505] (missed 1)	Isoform 1 of fibroblast growth factor receptor 4	FGFR4	0.863209		1.00432				1.46208	0.879866	0.762209			0.994338	0.275257
R.EKFLQEALTMR.Q [465, 475] (missed 1) (rank 1)	Isoform 1 of Focal adhesion kinase 1	PTK2		0.734275	0.441592						0.737689	0.680944		0.648625	0.140446
K.ASKGKLPIK.W [578, 586] (missed 2) (rank 2)	Isoform 1 of Focal adhesion kinase 1	PTK2			0.387191					0.876276	0.786041	0.833738		0.720811	0.225447
R.DIKPQNLLLDPDTAVLK.L [180, 196] (rank 1)	Isoform 1 of Glycogen synthase kinase-3 beta	GSK3B			0.67		0.75			0.460829	0.588235		0.606061	0.615025	0.107022
R.SIPDGSEKGDFIALDLGGSSFR.I [69, 90] (missed 1) (rank 3)	Isoform 1 of Hexokinase-1	HK1			0.81	1.33			1.03093	0.877193	0.636943		0.952381	0.939574	0.233756
K.GFKATDCVGHDVVTLLR.D [621, 637] (missed 1) (rank 1)	Isoform 1 of Hexokinase-1	HK1	0.94402		0.724343	0.985581			1.066	0.886466	0.809753		0.956981	0.91045	0.114371
R.GIFETKFLSQIESDR.L [779, 793] (missed 1) (rank 2)	Isoform 1 of Hexokinase-1	HK1	1.22		0.89	1.19					0.826446	1.26582		1.07845	0.204088
R.DLKPENLLFK.D [147, 156]	Isoform 1 of MAP kinase-activated protein kinase 5	MAPKAPK5/PRAK		0.409091	0.818182					0.666667	0.977778			0.717929	0.241923
R.ELASKQVQFDPDSPETSK.E [386, 403] (missed 1) (rank 1)	Isoform 1 of Mitogen-activated protein kinase kinase kinase 3	MAP3K3				1.6				0.699301	0.671141		0.662252	0.908173	0.461488
R.DIKGANIFLTSSGLIK.L [1462, 1477] (missed 1) (rank 1)	Isoform 1 of Mitogen-activated protein kinase kinase kinase 4	MAP3K4			0.58					0.657895	0.689655		0.819672	0.686806	0.0998414
R.DIKGDNVLINTFSGLLK.I [770, 786] (missed 1) (rank 1)	Isoform 1 of Mitogen-activated protein kinase kinase kinase 6	MAP3K6	1.2		1.13	0.93			0.847458	0.591716	0.595238		0.952381	0.892399	0.236931
R.DIKGANILLTDNGHVK.L [135, 150] (missed 1) (rank 1)	Isoform 1 of Mitogen-activated protein kinase kinase kinase kinase 3	MAP4K3			0.382244	0.61529			0.607946			0.736603		0.585521	0.147802
R.DIKGQNVLLTHNAEVK.L [176, 191] (missed 1)	Isoform 1 of Nik-related protein kinase	NRK	1.94221		0.485154				1.41911	1.1307	0.84726		1.24488	1.17822	0.497651
R.ALLYKR.H [7955, 7960] (missed 1) (rank 1)	Isoform 1 of Obscurin	OBSCN	0.9		0.91				0.769231	0.341297	0.287356			0.641577	0.304454
R.IQKSSNFGYITSCYK.A [347, 361] (missed 1) (rank 2)	Isoform 1 of PAB-dependent poly(A)-specific ribonuclease subunit 3	PAN3		1.068	0.93633						0.846024			0.950118	0.111629
R.VMDPTKILITGK.T [493, 504] (missed 1) (rank 1)	Isoform 1 of PAB-dependent poly(A)-specific ribonuclease subunit 3	PAN3		0.824365	0.888325				1.23434	0.818106	0.938095	1.21305	0.732887	0.949881	0.197614
K.LKGAVLAAVSSHK.F [303, 315] (missed 1) (rank 2)	Isoform 1 of Peripheral plasma membrane protein CASK	CASK			1.24						0.869565		1.03093	1.04683	0.185729
R.LATLPTKEQK.T [338, 347] (missed 1) (rank 1)	Isoform 1 of Phosphatidylinositol 4-kinase beta	PI4KB			0.646593	0.862124				0.817358	0.78875			0.778706	0.0931079
R.VPHTQAVVLNSKDK.A [380, 393] (missed 1) (rank 2)	Isoform 1 of Phosphatidylinositol 4-kinase beta	PI4KB			0.744966	0.751678				0.716346			0.90303	0.779005	0.0840908
K.DLPTFKDNDFLNEGQK.L [233, 248] (missed 1) (rank 1)	Isoform 1 of Phosphatidylinositol-5-phosphate 4-kinase type-2 beta	PIP4K2B			0.701559					0.836127	0.907071			0.814919	0.104384
K.TMNDFDYLKLLGK.G [143, 155] (missed 1) (rank 2)	Isoform 1 of RAC-gamma serine/threonine-protein kinase	AKT3			1.27505	1.49705			1.08298	0.935662	1.63141	1.60568		1.33797	0.28772
K.IPVAIKVLR.E [747, 755] (missed 1) (rank 1)	Isoform 1 of Receptor tyrosine-protein kinase erbB-2	ERBB2			0.771037	0.563601			0.767267	0.949814	0.986486		0.771903	0.801685	0.152177
K.DLKPENILVDNDFHIK.I [137, 152] (rank 1)	Isoform 1 of Receptor-interacting serine/threonine-protein kinase 1	RIPK1	0.98		1.23				1.26582	0.52356	0.574713		0.75188	0.887663	0.321767
R.LNVEFALIHKER.K [184, 195] (missed 1) (rank 2)	Isoform 1 of Ribose-phosphate pyrophosphokinase 2	PRPS2			1.17541				1.04219		0.975146		1.19107	1.09595	0.104636
R.VAILVDDMADTCGTICHAADKLLSAGATK.V [214, 242] (missed 1) (rank 1)	Isoform 1 of Ribose-phosphate pyrophosphokinase 2	PRPS2			0.98	1.58			0.892857		0.606061			1.01473	0.409308
K.LLSAGATKVYAILTHGIFSGPAISR.I [235, 259] (missed 1) (rank 3)	Isoform 1 of Ribose-phosphate pyrophosphokinase 2	PRPS2			1	1.07018			1.05556		1.01786			1.0359	0.0325346
K.VAIKIISK.R [245, 252] (missed 1) (rank 3)	Isoform 1 of Serine/threonine-protein kinase Chk2	CHEK2			0.98	1.06		0.689655	0.925926	0.480769	0.617284	0.847458	0.613497	0.776824	0.205658
R.DLKPENVLLSSQEEDCLIK.I [346, 364] (rank 1)	Isoform 1 of Serine/threonine-protein kinase Chk2	CHEK2			0.715026	0.683938			1.2293	0.647651	0.794239		1.01579	0.847657	0.228548
R.MFDGKFVVATFYPLSAYK.R [392, 409] (missed 1)	Isoform 1 of Serine/threonine-protein kinase Kist	UHMK1				0.5822				0.911036	0.757491			0.750242	0.164538
K.ALYATKTLR.K [728, 736] (missed 1) (rank 1)	Isoform 1 of Serine/threonine-protein kinase LATS1	LATS1			0.44	0.58				0.497512	0.387597	0.645161	0.740741	0.548502	0.132328
K.IGEGSFGKAILVK.S [9, 21] (missed 1) (rank 2)	Isoform 1 of Serine/threonine-protein kinase Nek1	NEK1			0.73	0.78				0.507614	0.704225		0.909091	0.726186	0.145448
R.DIKSQNIFLTK.D [127, 137] (missed 1) (rank 1)	Isoform 1 of Serine/threonine-protein kinase Nek1	NEK1	1.51		1.07	1.1				0.649351	0.757576		1	1.01449	0.301816
R.DLKPANVFLDGK.Q [140, 151] (rank 1)	Isoform 1 of Serine/threonine-protein kinase Nek2	NEK2		0.94	0.92	0.9				0.787402	0.70922	0.606061	0.632911	0.785085	0.139268
R.DLKTQNVFLTR.T [130, 140] (missed 1) (rank 1)	Isoform 1 of Serine/threonine-protein kinase Nek4	NEK4			0.686353	0.794094				0.745833	0.891815		0.94566	0.812751	0.105734
R.DLKAENLLLDANLNIK.I [187, 202] (missed 1) (rank 1)	Isoform 1 of Serine/threonine-protein kinase SIK3	SIK3			1.18	1				0.653595	0.884956			0.929638	0.220475
K.QLMTLENKLK.A [476, 485] (missed 1) (rank 2)	Isoform 1 of Serine/threonine-protein kinase TAO1	TAOK1			0.99				0.757576	0.411523	0.393701		0.526316	0.615823	0.254554
R.EVVAIKCVAK.K [38, 47] (missed 1) (rank 1)	Isoform 1 of Serine/threonine-protein kinase ULK3	ULK3			0.837529	1.00915			1.37421	0.791667	0.822976		1.05556	0.981849	0.220167
R.NISHLDLKPQNILLSSLEKPHLK.L [131, 153] (rank 2)	Isoform 1 of Serine/threonine-protein kinase ULK3	ULK3			0.61	1.11			0.729927		0.943396			0.848331	0.222358
R.MLDVLEYIHENEYVHGDIKAANLLLGYK.N [149, 176] (missed 1) (rank 1)	Isoform 1 of Serine/threonine-protein kinase VRK2	VRK2			1.31	1.48					0.840336	0.793651		1.106	0.341385
R.DLKPHNILISMPNAHGK.I [687, 703] (rank 1)	Isoform 1 of Serine/threonine-protein kinase/endoribonuclease IRE1	ERN1	0.529412		1.23529	1.58824			0.809524		1.13333	1.88889		1.19745	0.49661
R.STGPAKSR.D [193, 200] (missed 1) (rank 2)	Isoform 1 of Transcription intermediary factor 1-beta	TRIM28	0.613739		0.53491					0.652941	0.69375			0.623835	0.0676877
R.KLLASLVK.R [253, 260] (missed 1) (rank 1)	Isoform 1 of Transcription intermediary factor 1-beta	TRIM28	0.82		0.84					0.8	0.757576			0.804394	0.0352259
K.MAILQIMKELNK.R [296, 307] (missed 1) (rank 4)	Isoform 1 of Transcription intermediary factor 1-beta	TRIM28	0.93		0.89					0.869565	0.826446			0.879003	0.0431003
K.LTEDKADVQSIIGLQR.F [774, 789] (missed 1) (rank 3)	Isoform 1 of Transcription intermediary factor 1-beta	TRIM28	0.43		0.84					0.689655	0.595238			0.638723	0.171817
R.DIKPDNILLDR.C [194, 204] (rank 1)	Isoform 10 of Myotonin-protein kinase	DMPK	0.38	0.98	0.75	0.9		0.653595	0.625	0.438596	0.45045	0.41841	0.606061	0.620211	0.207134
K.DVAIKQIESESER.K [58, 70] (missed 1) (rank 2)	Isoform 1A of Mitogen-activated protein kinase kinase kinase 7	MAP3K7			0.72						0.26455		0.214133	0.399561	0.278651
R.DLKPPNLLLVAGGTVLK.I [155, 171] (rank 1)	Isoform 1A of Mitogen-activated protein kinase kinase kinase 7	MAP3K7			0.66	0.89		0.793651	0.869565	0.578035	0.591716	0.510204	0.555556	0.681091	0.149212
R.DLKVENILLHDR.G [175, 186] (missed 1) (rank 1)	Isoform 2 of AP2-associated protein kinase 1	AAK1			0.797101						0.8625		0.958333	0.872645	0.0810933
K.KGSEQESVK.E [8, 16] (missed 1) (rank 1)	Isoform 2 of cAMP-dependent protein kinase catalytic subunit alpha	PRKACA				1.54				2.08333	2.38095			2.00143	0.426417
R.DIKCSNILLNNR.G [836, 847] (missed 1) (rank 1)	Isoform 2 of Cell division protein kinase 13	CDK13			1.1	1.37			0.943396	0.534759	0.555556			0.900742	0.358756
R.DIKPSNILLDR.S [239, 249] (rank 1)	Isoform 2 of Dual specificity mitogen-activated protein kinase kinase 4	MAP2K4	1.68	1.09	0.93	1.06		1.38889	0.892857	0.877193	0.934579	0.729927	0.819672	1.04031	0.28873
R.TVLTTQPNGLTTVGK.T [28, 42]	Isoform 2 of Dual specificity tyrosine-phosphorylation-regulated kinase 2	DYRK2	1.2524		0.834049	1.26231			0.83805				2.18341	1.27404	0.55028
R.GAFGKVYLGQK.G [43, 53] (missed 1) (rank 2)	Isoform 2 of Microtubule-associated serine/threonine-protein kinase-like	MASTL			0.93	1.14			1.25		0.662252		0.917431	0.979937	0.226869
K.LYAVKVVK.K [57, 64] (missed 1) (rank 1)	Isoform 2 of Microtubule-associated serine/threonine-protein kinase-like	MASTL			0.71	1.18			0.961538				0.746269	0.899452	0.2175
R.DLKPDNMLISNEGHIK.L [155, 170] (rank 3)	Isoform 2 of Microtubule-associated serine/threonine-protein kinase-like	MASTL			0.82	1.27			0.900901					0.996967	0.239889
R.DLKPSNLLVNENCELK.I [42, 57] (rank 1)	Isoform 2 of Mitogen-activated protein kinase 7	MAPK7/ERK5			1.11	1				0.581395	0.657895			0.837323	0.257235
K.WISQDKEVAVKK.L [34, 45] (missed 2) (rank 1)	Isoform 2 of Mitogen-activated protein kinase kinase kinase MLT	ZAK		0.832941					0.90812	0.93819				0.893084	0.0542115
R.VAIKTLKPGTMSPEAFLQEAQVMK.K [300, 323] (missed 1) (rank 1)	Isoform 2 of Proto-oncogene tyrosine-protein kinase Src	SRC			1.44	1.43			1.72414					1.53138	0.167009
K.KNPQAVLDVLEFYNSK.K [118, 133] (missed 1) (rank 1)	Isoform 2 of Serine/threonine-protein kinase PAK 1	PAK1			1.09	0.95			0.8		0.675676	1.03093		0.909321	0.170021
R.DVKAGNILLSEPGLVK.L [150, 165] (missed 1) (rank 1)	Isoform 2 of Serine/threonine-protein kinase TAO2	TAOK2	0.59		0.89	0.77			0.787402	0.75188	0.746269		0.735294	0.752978	0.0886665
R.YAAVKIHQLNK.S [501, 511] (missed 1) (rank 2)	Isoform 2 of Serine/threonine-protein kinase tousled-like 1	TLK1			0.91	1.5			0.862069				0.641026	0.978274	0.367015
R.YLNEIKPPIIHYDLKPGNILLVDGTACGEIK.I [594, 624] (rank 1)	Isoform 2 of Serine/threonine-protein kinase tousled-like 1	TLK1	1.05	1.02	0.9	1.26			0.854701	0.806452	0.961538	1.04167		0.986795	0.141872
R.YVAVKIHQLNK.N [464, 474] (missed 1) (rank 1)	Isoform 2 of Serine/threonine-protein kinase tousled-like 2	TLK2			1.29588	0.867631				0.982514	0.951323		1.3029	1.08005	0.204604
K.VMVAVKIISK.K [48, 57] (missed 1)	Isoform 2 of Testis-specific serine/threonine-protein kinase 4	TSSK4	1.06584		0.812071						0.737854		1.30411	0.979971	0.257717
K.IDDKAFSLKQR.E [4489, 4499] (missed 2) (rank 1)	Isoform 2 of Titin	TTN	1.04936		0.819712		1.2643			1.01797			1.13087	1.05644	0.163031
R.SDDNEKALK.I [175, 183] (missed 1) (rank 2)	Isoform 3 of Adenylate kinase 2, mitochondrial	AK2			0.96	1.23			1.1236	0.641026	0.806452		0.75188	0.918825	0.227212
R.AVLLGPPGAGK.G [17, 27] (rank 3)	Isoform 3 of Adenylate kinase 2, mitochondrial	AK2	0.847393	0.67109	0.95545					0.883585	0.920593			0.855622	0.11078
K.LVSDEMVVELIEKNLETPLCK.N [72, 92] (missed 1) (rank 2)	Isoform 3 of Adenylate kinase 2, mitochondrial	AK2	0.52437		0.813445					0.670045	0.854885			0.715686	0.150131
R.DLKPENLLLDEK.N [140, 151] (rank 1)	Isoform 3 of BR serine/threonine-protein kinase 2	BRSK2			1.01887	0.946092			1.02204	0.792735	1.0944		1.13456	1.00145	0.121417
R.DIKPSNLLVGEDGHIK.I [311, 326] (rank 1)	Isoform 3 of Calcium/calmodulin-dependent protein kinase kinase 2	CAMKK2			0.86				0.724638	0.526316	0.460829		0.423729	0.599102	0.186413
R.TGEVVAIKK.I [34, 42] (missed 1) (rank 1)	Isoform 3 of Mitogen-activated protein kinase 15	MAPK15	0.890411		1.57534						1.21667	1.21667	1.12308	1.20443	0.246527
R.DTVTIHSVGGTITILPTKTKPK.K [1486, 1507] (missed 1) (rank 1)	Isoform 3 of Serine/threonine-protein kinase SMG1	SMG1			0.648045	0.620112			0.648551		0.840376			0.689271	0.101609
K.SYPYLFKGLEDLHLDER.I [1518, 1534] (missed 1) (rank 2)	Isoform 3 of Serine/threonine-protein kinase SMG1	SMG1			0.55	0.75				0.473934	0.680272			0.613551	0.124635
R.FTDDYQLFEELGKGAFSVVR.R [9, 28] (missed 1) (rank 2)	Isoform 4 of Calcium/calmodulin-dependent protein kinase type II subunit gamma	CAMK2G			0.92				0.775194	0.729927	0.671141	0.704225	0.961538	0.793671	0.119631
K.TSTQEYAAKIINTK.K [34, 47] (missed 1) (rank 3)	Isoform 4 of Calcium/calmodulin-dependent protein kinase type II subunit gamma	CAMK2G			1.09	1.85			1.21951		0.549451		0.657895	1.07337	0.517663
K.IKIIR.G [2440, 2444] (missed 1) (rank 1)	Isoform 6 of Titin	TTN	0.97417					0.954225	1.20982				0.86859	1.0017	0.14611
K.TQLNSSSLQKLFR.E [53, 65] (missed 1) (rank 1)	Isoform 7 of Serine/threonine-protein kinase MARK2	MARK2			0.990619	1.13696			1.14378		1.00188			1.06831	0.0833807
R.LPVIDPISGNALYILTHKR.I [384, 402] (missed 1) (rank 1)	Isoform A of 5'-AMP-activated protein kinase subunit gamma-2	PRKAG2				1.06			1.33333	2.5641	1.47059			1.60701	0.660494
R.DLKPENLLLASKLK.G [134, 147] (missed 1) (rank 1)	Isoform A of Calcium/calmodulin-dependent protein kinase type II subunit alpha	CAMK2A			1.07479	0.70078		1.53358	1.36083	0.595575	0.93825	0.923629		1.01821	0.336877
R.GKLQLVVLR.D [374, 382] (missed 1) (rank 1)	Isoform A1 of Tight junction protein ZO-2	TJP2			0.69	0.67				0.636943	0.41841		0.492611	0.581593	0.11956
R.DLKPENIILNHQGHMK.L [89, 104] (rank 1)	Isoform Alpha I of Ribosomal protein S6 kinase beta-1	RPS6KB1				1.89397			2.23965				1.51622	1.88328	0.361832
R.DVKPSNMLVNTR.G [282, 293] (rank 1)	Isoform B of Dual specificity mitogen-activated protein kinase kinase 5	MAP2K5/MEK5			1.03	1.33		1.19048	0.806452	0.980392	0.862069	0.689655	1.16279	1.00648	0.215616
R.DIKAANVLLSEHGEVK.L [155, 170] (missed 1) (rank 1)	Isoform B of Serine/threonine-protein kinase 24	STK24			1.16	1.1				0.613497	0.961538		0.714286	0.909864	0.238471
K.NLVPMDPNGLSDPYVKLK.L [181, 198] (missed 1) (rank 1)	Isoform Beta-I of Protein kinase C beta type	PRKCB			0.807128	0.885744			0.983505	0.829565	0.921739			0.885536	0.0710444
K.GSFGKVMLSER.K [350, 360] (missed 1)	Isoform Beta-I of Protein kinase C beta type	PRKCB	0.76		0.96								0.787402	0.835801	0.108429
R.DLKPSNLAVNEDCELK.I [149, 164] (rank 1)	Isoform CSBP2 of Mitogen-activated protein kinase 14	MAPK14		1.12	0.73	1.24		1.49254	1.5873	0.649351	0.555556	1.0101		1.04811	0.384427
K.YSLTVAVKTLK.E [263, 273] (missed 1) (rank 1)	Isoform IA of Tyrosine-protein kinase ABL1	ABL1			0.86	0.88				0.340136	0.353357	0.273973	0.546448	0.542319	0.269652
R.ILKETELK.R [711, 718] (missed 1) (rank 1)	Isoform JM-A CYT-1 of Receptor tyrosine-protein kinase erbB-4	ERBB4	1.38		0.97	1.47			0.961538		0.578035		0.943396	1.05049	0.326692
K.IPVAIKILNETTGPK.A [745, 759] (missed 1)	Isoform JM-A CYT-1 of Receptor tyrosine-protein kinase erbB-4	ERBB4	0.998672			1.20584			1.0121		1.23849			1.11377	0.125985
K.LNLLTEYIEGGTLKDFLR.S [400, 417] (missed 1) (rank 1)	Isoform LIMK2a of LIM domain kinase 2	LIMK2			1.16	1.39			1.25	0.847458	0.606061		0.689655	0.990529	0.320759
K.EQKLGLENAEALIR.L [49, 62] (missed 1) (rank 3)	Isoform Long of 60 kDa SS-A/Ro ribonucleoprotein	TROVE2	0.87	0.78				0.892857	0.729927	0.492611	0.571429		0.471698	0.686932	0.175051
R.LSHLKPSSEGLAIVTK.Y [184, 199] (rank 1)	Isoform Long of 60 kDa SS-A/Ro ribonucleoprotein	TROVE2	0.886076	0.860759	0.886076	0.962025		1.71739	0.718182	0.840426	0.918605	1.31667	0.718182	0.982439	0.307239
K.TVAVKILK.N [397, 404] (missed 1) (rank 1)	Isoform Long of Tyrosine-protein kinase SYK	SYK			0.85			0.78125		0.469484	0.543478		0.900901	0.709023	0.191502
K.ISDFGLSKALR.A [509, 519] (missed 1) (rank 2)	Isoform Long of Tyrosine-protein kinase SYK	SYK			0.79			0.917431	0.961538	0.497512	0.632911	0.549451	0.78125	0.732871	0.178412
R.FMEELGECAFGKIYK.G [474, 488] (missed 1)	Isoform Long of Tyrosine-protein kinase transmembrane receptor ROR1	ROR1	2.0177	2.08316					3.09759			2.33781		2.38406	0.495322
K.GHLYLPGMDHAQLVAIKTLK.D [489, 508] (missed 1)	Isoform Long of Tyrosine-protein kinase transmembrane receptor ROR1	ROR1	0.9	0.9	2.7	0.9		2.22222	1.11111	1.11111	2.22222	1.11111		1.4642	0.707582
K.VAVKTLKPGTMSVQAFLEEANLMK.T [271, 294] (missed 1) (rank 1)	Isoform LYN A of Tyrosine-protein kinase Lyn	LYN	1.8	0.97	1.12	1.55			0.961538	0.740741	0.806452			1.13553	0.394836
K.VAVKTMKPGSMSVEAFLAEANVMK.T [265, 288] (missed 1)	Isoform p59-HCK of Tyrosine-protein kinase HCK	HCK	1.11		1.11	1.45		0.724638	0.877193	1.04167	0.671141	1.03093	0.819672	0.981693	0.239256
R.IQCAIKSLSR.I [1108, 1117] (missed 1) (rank 1)	Isoform RON of Macrophage-stimulating protein receptor	PTK8			0.547826	0.869565			1.25683	0.795848	0.674487		0.954357	0.849819	0.245695
K.ELFDELVKK.F [46, 54] (missed 1) (rank 1)	Isoform Short of Adenosine kinase	ADK			0.603066	1.29813			1.29581	0.877429	0.770341		1.12452	0.994882	0.288808
K.DIKEIAK.K [239, 245] (missed 1) (rank 2)	Isoform Short of Adenosine kinase	ADK			0.891626	0.871921				0.971292	0.828571			0.890853	0.0597451
R.VGYWLSEKK.I [9, 17] (missed 1) (rank 1)	Isoform 1 of Inositol-tetrakisphosphate 1-kinase	ITPK1				0.91				1.03093	1.03093			0.990619	0.0698177
K.SDAAMTVAVKMLKPSAHLTER.E [613, 633] (missed 1)	KIT Isoform 1 of Mast/stem cell growth factor receptor	KIT				1.07064			0.822639		1.40103			1.0981	0.290172
K.VAVKSLK.Q [313, 319] (missed 1) (rank 1)	cDNA FLJ56184, highly similar to Proto-oncogene tyrosine-protein kinase LCK	LCK			0.674868	1.31283			1.44784	0.77415	0.831871		1.20807	1.0416	0.321345
R.QGKSTLLEILQTGR.A [648, 661] (missed 1)	leucine-rich repeat serine/threonine-protein kinase 1	LRRK1	0.96		1.05				0.990099	0.813008	1.23457			1.00954	0.153078
R.KILLSK.G [433, 438] (missed 1) (rank 1)	Leucine-rich repeat serine/threonine-protein kinase 2	LRRK2			1.39	1.66			1.28205	0.862069	0.628931		0.925926	1.12483	0.383657
K.ELLVDCYKPTEAFISGLLDK.I [653, 672] (rank 2)	LIM domain kinase 2 isoform 1	LIMK2	1.1		1.05				0.833333				0.689655	0.918247	0.191361
R.LLLKTDPTER.L [282, 291] (missed 1) (rank 1)	MAP kinase-activated protein kinase 3	MAPKAPK3			0.824877	1.38912		1.53807	1.28361	0.719882	0.959184		1.08094	1.11367	0.302291
R.DLKPSNILYVDESGNPECLR.I [534, 553] (rank 1)	Isoform 1 of MAP kinase-activated protein kinase 1a	MAPKAPK1A			0.853242				1.22723	1.00171	0.984874		0.758576	0.965125	0.177204
K.VLGQGSFGKVFLVK.K [72, 85] (missed 1) (rank 3)	Isoform 1 of MAP kinase-activated protein kinase 1b	MAPKAPK1B	0.99		1.12				0.900901		0.735294		0.571429	0.863525	0.215021
R.DLKPSNILYVDESGNPESIR.I [538, 557] (rank 1)	Isoform 1 of MAP kinase-activated protein kinase 1b	MAPKAPK1B			0.86				0.990099	0.574713	0.662252	0.628931	0.75188	0.744646	0.156628
R.DLKPSNILYR.D [531, 540]	Isoform 1 of MAP kinase-activated protein kinase 1c	MAPKAPK1C	1.0528							0.932046			1.14379	1.04288	0.106218
K.VTSQVLGLGINGKVLQIFNK.R [64, 83] (missed 1) (rank 1)	Isoform 1 of MAP kinase-activated protein kinase 2	MAPKAPK2			0.81		0.82			0.813008			1.17647	0.90487	0.181116
R.DLKAENLLLDAEANIK.I [210, 225] (missed 1) (rank 1)	MARK4 R31237_1 (Fragment)	MARK4			1.01						0.862069		0.934579	0.935549	0.0739703
R.DLKPENLLFDEYHK.L [131, 144] (rank 1)	Maternal embryonic leucine zipper kinase	MELK				0.7				0.595238	0.662252	0.617284		0.643693	0.0467626
K.LIDFGLCAKPK.G [147, 157] (rank 2)	Maternal embryonic leucine zipper kinase	MELK			0.93					0.558659	0.578035			0.688898	0.209025
R.DTLLALAHLHSQGLVHLDVKPANIFLGPR.G [215, 243] (rank 1)	membrane-associated tyrosine- and threonine-specific cdc2-inhibitory kinase isoform 2	PKMYT1			0.83				0.934579		0.617284	0.653595	0.840336	0.775159	0.134511
K.VAIKILDK.T [99, 106] (missed 1)	MGC42105 Serine/threonine-protein kinase NIM1	NIM1K			0.96				0.819672	1.16279			0.757576	0.92501	0.179717
R.DLKPDNLLITSLGHIK.L [489, 504] (rank 1)	Microtubule-associated serine/threonine-protein kinase 3	MAST3			1.04	1.32			1.14943	0.8	0.793651		0.961538	1.01077	0.204788
R.DLKPSNLLLNTTCDLK.I [148, 163] (rank 1)	Mitogen-activated protein kinase 1	MAPK1/ERK2	1.24	1.21	1.16	1.13	1.08	0.806452	0.8	0.694444	0.746269	0.806452	0.70922	0.943894	0.21753
R.LFPNADSKALDLLDK.M [277, 291] (missed 1) (rank 2)	Mitogen-activated protein kinase 1	MAPK1/ERK2			0.793103	0.970443			0.808765	0.914414	1.10326			0.917997	0.127099
R.DLKPSNLLINTTCDLK.I [165, 180] (rank 1)	Mitogen-activated protein kinase 3	MAPK3/ERK1	0.74	0.93	0.84	0.97	0.8	0.990099	0.934579	0.826446	0.854701	0.925926	0.943396	0.886832	0.0790086
R.DLKPANLFINTEDLVLK.I [151, 167] (rank 1)	Mitogen-activated protein kinase 6	MAPK6/ERK3			0.59	0.46		0.571429	0.392157	0.302115	0.34965	0.348432	0.436681	0.431308	0.105173
R.DVKGANLLIDSTGQR.L [1368, 1382] (missed 1) (rank 1)	Mitogen-activated protein kinase kinase kinase 1	MAP3K1			0.86	0.9			0.497512	0.469484	0.581395		0.591716	0.650018	0.184685
R.GELVAVKAAR.Q [137, 146] (missed 1) (rank 2)	Mitogen-activated protein kinase kinase kinase 11	MAP3K11			0.85					0.595238	0.625			0.690079	0.139292
R.DLKSNNILLLQPIESDDMEHK.T [240, 260] (missed 1) (rank 1)	Mitogen-activated protein kinase kinase kinase 11	MAP3K11				0.829412				0.862944	0.988372			0.893576	0.0837904
R.ELAVKQVQFDPDSPETSK.E [380, 397] (missed 1) (rank 1)	Mitogen-activated protein kinase kinase kinase 2	MAP3K2			0.864865	1.26351				1.0137	1.12977			1.06796	0.169562
K.TLSIFMEYMPGGSIKDQLK.A [431, 449] (missed 1) (rank 2)	Mitogen-activated protein kinase kinase kinase 2	MAP3K2			1.06	1.34			0.719424	0.806452	1.14943		0.892857	0.994693	0.231958
R.DIKGDNVLINTYSGVLK.I [802, 818] (missed 1) (rank 1)	Mitogen-activated protein kinase kinase kinase 5	MAP3K5			0.7				0.531915				0.70922	0.647045	0.099812
R.DIKGANILINDAGEVR.L [136, 151] (missed 1) (rank 1)	Mitogen-activated protein kinase kinase kinase kinase 1	MAP4K1			0.78	0.91				0.714286	0.793651		0.381679	0.715923	0.199709
R.DTVTSELAAVKIVK.L [34, 47] (missed 1) (rank 2)	Mitogen-activated protein kinase kinase kinase kinase 2	MAP4K2	0.58		0.88				0.381679	0.487805	0.561798		0.653595	0.590813	0.169043
R.KFALTTK.I [608, 614] (missed 1) (rank 1)	Mitogen-activated protein kinase kinase kinase kinase 5	MAP4K5			0.625387	0.869969			0.836788	0.801489	0.941691			0.815065	0.117986
R.APVAIKVFK.K [224, 232] (missed 1) (rank 1)	Isoform 1 of Mixed lineage kinase domain-like protein	MLKL			0.83					0.406504	0.534759	0.543478		0.578685	0.178862
R.KAGVDPLVPLR.S [104, 114] (missed 1) (rank 2)	N-acetyl-D-glucosamine kinase	NAGK			0.99	1.24				1.13636	1.0101			1.09412	0.116856
K.GNLVAVKR.V [560, 567] (missed 1) (rank 1)	Natriuretic Peptide Receptor 1	ANPRA			0.89					0.348432	0.408163		0.60241	0.562251	0.243922
R.HRYEFLETLGKGTYGK.V [94, 109] (missed 2) (rank 2)	cDNA FLJ56013, highly similar to NUAK family SNF1-like kinase 2	NUAK2	0.88						1.06383		1.11111			1.01831	0.122094
R.GDFCIEVGKNLIHGSDSVESAR.R [122, 143] (missed 1) (rank 1)	Nucleoside diphosphate kinase 3	NME3			0.650138	1.01928			1.1135		0.698077			0.870249	0.23056
R.LMDEAKILK.S [81, 89] (missed 1) (rank 2)	cDNA FLJ58333, highly similar to T-lymphokine-activated killer cell-originated protein kinase	PBK			0.689448	1.03717			1.0902		1.15034		0.672581	0.927948	0.229024
K.DVTKAMDEK.K [325, 333] (missed 1) (rank 3)	Isoform 2 of 6-phosphofructokinase, muscle type	PFKM			0.851064	0.904255				0.895238	0.752		1.25333	0.931178	0.18995
R.IYQGSSGSYFVKDPQGR.I [129, 145] (missed 1) (rank 2)	Phosphatidylinositol 4-kinase type 2-alpha	PI4K2A			0.81					0.653595	0.555556			0.67305	0.128333
R.IIAVFKPK.N [146, 153] (rank 1)	Phosphatidylinositol 4-kinase type 2-alpha	PI4K2A			0.79				0.653595	0.558659	0.440529		0.429185	0.574393	0.151667
K.SEEPYGQLNPKWTK.Y [150, 163] (missed 1) (rank 1)	Phosphatidylinositol 4-kinase type 2-beta	PI4K2B			0.56					0.606061	0.793651			0.653237	0.123763
R.IMSSAKR.P [770, 776] (missed 1) (rank 1)	Phosphatidylinositol-4,5-bisphosphate 3-kinase catalytic subunit alpha isoform	PIK3CA			0.876791	1.13467			1.10794	0.969444	1.0295			1.02367	0.104845
K.VNWLAHNVSKDNRQ.- [1030, 1043] (missed 2)	Phosphatidylinositol-4,5-bisphosphate 3-kinase catalytic subunit delta isoform	PIK3CD			0.75835	0.891945			0.88676	0.807937	1.03036		0.986434	0.893632	0.102959
R.AVDQVIKAVR.K [572, 581] (missed 1) (rank 2)	Phosphatidylinositol-4-phosphate 3-kinase C2 domain-containing subunit alpha	PIK3C2A			1.0179	0.808184				1.10452	0.788306			0.929728	0.156098
K.ELPTLKDNDFINEGQK.I [228, 243] (missed 1) (rank 1)	Phosphatidylinositol-5-phosphate 4-kinase type-2 alpha	PIP4K2A			0.92	1.03			0.892857	0.925926	0.980392		0.840336	0.931585	0.066423
K.FKEYCPQVFR.N [99, 108] (missed 1) (rank 1)	Phosphatidylinositol-5-phosphate 4-kinase type-2 gamma	PIP4K2C			0.877232	0.904018			1.12281	0.825046	0.878431		1.02283	0.938394	0.111807
K.ELPTLKDMDFLNK.N [235, 247] (missed 1) (rank 2)	Phosphatidylinositol-5-phosphate 4-kinase type-2 gamma	PIP4K2C			0.654995	0.84655				0.847295	1.03079	0.865419	0.838515	0.84726	0.119209
K.LTLDKLDVK.G [6, 14] (missed 1) (rank 4)	Phosphoglycerate kinase 1	PGK1	0.472303		0.781341	1.32362		1.6028	1.17466	0.65458	0.64717		1.14333	0.974976	0.393559
K.DVLFLKDCVGPEVEK.A [91, 105] (missed 1) (rank 2)	Phosphoglycerate kinase 1	PGK1	0.934979		0.809877	0.823045		1.11673	1.19587	0.63546	0.730168		1.32065	0.945847	0.241641
K.DASGNKVK.A [133, 140] (missed 1) (rank 1)	Phosphoglycerate kinase 1	PGK1	0.798898		0.805785	1.52893		1.23051	1.13438	0.537778	0.562791		1.19016	0.973653	0.351431
K.VADKIQLINNMLDK.V [216, 229] (missed 1) (rank 6)	Phosphoglycerate kinase 1	PGK1	0.79		1.01			1.21951		0.588235	0.558659	0.487805	1.14943	0.829091	0.299143
K.ALMDEVVKATSR.G [353, 364] (missed 1) (rank 5)	Phosphoglycerate kinase 1	PGK1	0.875529	0.783082	0.712387	1.38671		1.05079	1.17877	0.701866	0.744489		1.48297	0.990734	0.299168
K.DCVGAEVEKACANPAPGSVILLENLR.F [97, 122] (missed 1) (rank 1)	Phosphoglycerate kinase 2	PGK2	1.4		0.8			1					0.862069	1.01552	0.269606
K.SPASAKR.A [188, 194] (missed 1) (rank 1)	Phosphoribosyl pyrophosphate synthase-associated protein 2	PRPSAP2	0.749606		0.551181	1.17953			1.30524	0.775336	0.679508		1.00794	0.89262	0.277512
R.ATGHEFAVKIMEVTAER.L [44, 60] (missed 1) (rank 1)	Phosphorylase b kinase gamma catalytic chain, testis/liver isoform	PHKG2			0.66				0.862069	0.588235	0.826446		1.03093	0.793536	0.174725
R.DLKPENILLDDNMQIR.L [152, 167] (rank 2)	Phosphorylase b kinase gamma catalytic chain, testis/liver isoform	PHKG2				1.16			0.854701	0.787402	0.826446			0.907137	0.170818
R.GGKSGAAFYATEDDR.F [1858, 1872] (missed 1) (rank 1)	PIKFYVE 1-phosphatidylinositol-3-phosphate 5-kinase	PIP5K3				0.98895				0.947644	1.04624			0.994279	0.0495149
R.VIFPTGDSKVVLPCNLLR.M [967, 984] (missed 1) (rank 2)	POLR2a DNA-directed RNA polymerase II subunit RPB2	POLR2A			1.01074					0.925023	1.10108			1.01228	0.0880364
K.TFIGKIPIMLR.S [146, 156] (missed 1) (rank 1)	DNA-directed RNA polymerase II subunit RPB2	POLR2B	1.06079		0.744417				1.03333		0.634646		1.53524	1.00169	0.350028
R.HGQKGTCGIQYR.Q [938, 949] (missed 1) (rank 2)	DNA-directed RNA polymerase II subunit RPB2	POLR2B			0.85	0.9875				0.842105	1.02564			0.926312	0.0940293
K.TIKVYCQR.M [85, 92] (missed 1) (rank 1)	DNA-directed RNA polymerases I, II, and III subunit RPABC1	POLR2E				1.09				0.671141	0.621118			0.794086	0.257486
R.DLKLDNVLLDR.D [472, 482] (missed 1) (rank 1)	Protein kinase C delta type	PRKCD			0.86				1.16279		0.877193			0.966661	0.170071
K.GSFGKVMLAELK.G [416, 427] (missed 1)	Protein kinase C epsilon type	PRKCE			0.932981	0.963144			0.890434		0.958495	1.06664		0.962338	0.0650495
R.NLIPMDPNGLSDPYVKLK.L [181, 198] (missed 1) (rank 1)	cDNA FLJ60619, highly similar to Protein kinase C gamma type	PRKCG			0.897909	0.904059			1.37797	0.893407	0.739091			0.962486	0.242325
K.GSFGKVMLAR.V [363, 372] (missed 1)	Protein kinase C eta type	PRKCH			0.91498	0.910931			0.851724					0.892545	0.0354098
R.DVAVKVIDK.L [575, 583] (missed 1) (rank 1)	cDNA FLJ60070, highly similar to Serine/threonine-protein kinase D2	PRKD2			1.06	1.31			0.900901				0.671141	0.98551	0.268843
K.GSFGKVMLADR.K [347, 357] (missed 1) (rank 2)	Protein kinase C alpha type	PRKCA			1.14806	0.928482			0.957357	1.24531	0.929446			1.04173	0.146033
R.DLKLDNVMLDSEGHIK.I [462, 477] (missed 1) (rank 1)	Protein kinase C alpha type	PRKCA	0.770984		0.52228	0.67772				0.611534	0.718006		0.998965	0.716581	0.163095
K.GAENFDKFFTR.G [621, 631] (missed 1) (rank 3)	Protein kinase C alpha type	PRKCA			0.636569					0.87119	0.822656			0.776805	0.123849
R.DLKLDNVLLDSEGHIK.L [377, 392] (missed 1) (rank 1)	Protein kinase C iota type	PRKCI				0.51				0.60241	0.704225			0.605545	0.0971506
R.LPGGAAVALKAVDFSGHDLGSCVR.E [156, 179] (missed 1)	Protein kinase domain-containing protein, cytoplasmic	PKDCC	1.46465			1.04377			1.02414	1.26383	1.3814			1.23556	0.197503
R.SLDVVGKIR.R [55, 63] (missed 1) (rank 2)	Protein kinase, AMP-activated, alpha 1 catalytic subunit, isoform CRA_b	PRKAA1	0.77		0.88				0.854701	0.694444	0.719424		0.657895	0.762744	0.0892104
R.TGGQLSLGKCLK.Y [168, 179] (missed 1)	Proto-oncogene serine/threonine-protein kinase mos	MOS		1.65234	1.13148	0.437421		1.07766	1.86557	1.63768	0.768707	1.5757	0.565404	1.19022	0.520739
K.VAIKTLKPGTMMPEAFLQEAQIMK.K [301, 324] (missed 1) (rank 1)	Proto-oncogene tyrosine-protein kinase Yes	YES1	0.4		0.64	0.56			0.621118	0.52356	0.546448			0.548521	0.0853889
R.SSLQPITTLGKSEFGEVFLAK.A [663, 683] (missed 1) (rank 1)	Isoform 3 of Tyrosine-protein kinase-like 7	PTK7			1.39				1.21951	1.02041			1.28205	1.22799	0.155276
R.DLKSNNIFLHEGLTVK.I [431, 446] (missed 1) (rank 1)	Putative uncharacterized protein ARAF	ARAF			0.97417					0.860317	1.15812			0.997536	0.15027
R.EISLLKELR.H [52, 60] (missed 1) (rank 3)	Putative uncharacterized protein DKFZp686L20222	CCNB1	0.756952	0.514933	0.499485	0.99897		1.07293	0.647333		0.691103	0.744061	0.859292	0.753895	0.196909
R.DLKPQNLLIDDK.G [133, 144] (rank 1)	Putative uncharacterized protein DKFZp686L20222	CCNB1	0.8	0.98	0.8	0.95	0.88	0.645161	0.714286	0.763359	0.746269	0.699301	0.641026	0.783582	0.11371
K.KPLFHGDSEIDQLFR.I [206, 220] (rank 2)	Putative uncharacterized protein DKFZp686L20222	CCNB1	1.05	1.43	0.78	1.37		0.763359	1					1.06556	0.28387
R.VTMNEFEYLKLLGK.G [144, 157] (missed 1) (rank 1)	RAC-alpha serine/threonine-protein kinase	AKT1		0.58						0.518135	0.699301			0.599145	0.0920879
K.GTFGKVILVK.E [158, 167] (missed 1) (rank 2)	RAC-alpha serine/threonine-protein kinase	AKT1		0.55	0.86				0.657895	0.420168	0.47619	0.70922	0.724638	0.628302	0.154368
K.VTMNDFDYLKLLGK.G [146, 159] (missed 1) (rank 1)	RAC-beta serine/threonine-protein kinase	AKT2	0.83		0.79	0.3				0.363636	0.595238			0.575775	0.240809
K.WHGDVAVKILK.V [367, 377] (missed 1)	Isoform 1 of RAF proto-oncogene serine/threonine-protein kinase	RAF1				0.658818			1.29152	0.804554	0.797292		0.934815	0.8974	0.240984
K.NSLCFPEDAEISKHAK.N [310, 325] (missed 1) (rank 1)	Rho-associated protein kinase 2	ROCK2			0.72238	0.908983		1.09012	0.854859	1.05408	0.863543	0.851201		0.906453	0.127131
K.FFIGFGGKGANQCVQAAR.L [46, 63] (missed 1) (rank 1)	Ribokinase	RBKS				1.2029				1.13115	1.09524			1.14309	0.0548156
R.NCTIVSPDAGGAKR.V [163, 176] (missed 1) (rank 1)	Ribose-phosphate pyrophosphokinase 1	PRPS1			0.71	0.63		0.740741	0.819672	0.78125	0.8		0.330033	0.687385	0.169973
R.VLGVIDKVLLVMDTR.T [341, 355] (missed 1) (rank 1)	RPS6KC1 Ribosomal protein S6 kinase delta-1	RPS6KC1			1.55					1.88679		1.20482	1.0989	1.43513	0.357439
K.GTYGKVDLVVYK.G [61, 72] (missed 1)	Serine/threonine-protein kinase SBK1	SBK1				0.795861			0.794469	1.08028	0.980627			0.91281	0.141808
K.DYKLYDVETK.Y [145, 154] (missed 1) (rank 1)	SCY1-like protein 2	SCYL2				1.35				0.952381	1.66667			1.32302	0.357907
K.ETGALAAAKVIETK.S [56, 69] (missed 1) (rank 3)	Serine/threonine-protein kinase 10	STK10/LOK			1.13004					0.991111	1.16146			1.0942	0.0906528
R.DLKAGNVLMTLEGDIR.L [156, 171] (missed 1) (rank 1)	Serine/threonine-protein kinase 10	STK10/LOK			1.23	1.33		1.53846	1.33333	0.70922	1			1.19017	0.2934
R.HKNVIQLVDVLYNEEK.Q [106, 121] (missed 1) (rank 2)	Serine/threonine-protein kinase 11	STK11	0.78		0.9				0.75188		0.806452			0.809583	0.0642647
K.DIKPGNLLLTTGGTLK.I [175, 190] (rank 1)	Serine/threonine-protein kinase 11	STK11	1.15	1.25	0.99	1.25		1	0.769231	0.75188	0.847458	0.854701	1.03093	0.98942	0.184582
R.DIKPENLLLGLK.G [199, 210] (rank 1)	Serine/threonine-protein kinase 12	AURKB	0.9		0.9			0.390625	0.595238	0.420168	0.537634	0.490196	0.434783	0.583581	0.206081
R.DIKPDNLLLDSK.G [211, 222] (rank 1)	Serine/threonine-protein kinase 38	STK38	0.71		0.88				0.787402	0.653595	0.704225		0.606061	0.723547	0.0977836
R.DIKPDNLLLDAK.G [212, 223] (rank 1)	Serine/threonine-protein kinase 38-like	STK38L			0.62					0.625	0.636943		0.518135	0.600019	0.0550505
R.DIKPENLLLGSAGELK.I [255, 270] (rank 1)	Serine/threonine-protein kinase 6	AURKA			0.66	0.68			0.60241	0.662252	0.694444	0.649351	0.568182	0.645234	0.044583
R.DLKSNNIFLHEDLTVK.I [575, 590] (missed 1) (rank 1)	Serine/threonine-protein kinase B-raf	BRAF	0.41		0.73				0.763359	0.729927	0.662252		0.613497	0.651506	0.13016
R.DIKPENLLLDER.D [129, 140] (rank 2)	Serine/threonine-protein kinase Chk1	CHEK1		0.88	0.87			0.3663	0.255102	0.628931	0.27248	0.318471	0.389105	0.497549	0.259874
R.LSKGDGLEFK.R [442, 451] (missed 1) (rank 1)	Serine/threonine-protein kinase Chk1	CHEK1		0.77	0.76	0.66		0.719424	0.699301	0.398406	0.454545	0.381679	0.60241	0.605085	0.1547
R.DLKPENLLVQR.N [476, 486] (rank 1)	Serine/threonine-protein kinase DCLK3	DCLK3	0.64	0.75	0.71		0.64	0.657895	0.729927	0.990099		0.900901	0.694444	0.745918	0.121471
R.VEQKTTK.K [79, 85] (missed 1)	Serine/threonine-protein kinase H2	PSKH2			1.04741	1.0819				1.14851				1.09261	0.0513947
R.DMKPENLLCMGPELVK.I [124, 139]	Serine/threonine-protein kinase MAK	MAK			0.63	0.64				0.892857				0.720952	0.148958
K.YASLCGKSGR.L [1655, 1664] (missed 1) (rank 1)	Serine/threonine-protein kinase mTOR	MTOR			0.9199	0.926158			1.175	0.815306	0.92907			0.953087	0.132884
K.KSLAYVDNILK.K [76, 86] (missed 1) (rank 2)	Serine/threonine-protein kinase N2	PKN2	0.623752		0.563872					0.782813	0.85641	0.731387		0.711647	0.118294
R.DLKLDNLLLDTEGFVK.I [781, 796] (missed 1) (rank 1)	Serine/threonine-protein kinase N2	PKN2			0.82	0.71				0.735294	0.917431		0.757576	0.78806	0.083012
K.EINFEKMPIQEK.E [33, 44] (missed 1) (rank 1)	Serine/threonine-protein kinase Nek5	NEK5			0.772834	1.16159			1.01185	0.827519	0.920259		1.27844	0.995416	0.195637
R.AACLLDGVPVALKK.V [50, 63] (missed 1) (rank 1)	Serine/threonine-protein kinase Nek7	NEK7	0.59	0.54						0.497512	0.621118		0.625	0.574726	0.0549564
R.DLKTQNILLDK.H [127, 137] (missed 1) (rank 1)	Serine/threonine-protein kinase Nek8	NEK8		0.76	0.66					0.625	0.60241			0.661852	0.0695891
R.DIKTLNIFLTK.A [175, 185] (missed 1) (rank 2)	Serine/threonine-protein kinase Nek9	NEK9	0.6639		0.829876	1.12863		1.50625	1.33889	0.762658	0.647849		0.899254	0.972163	0.319347
K.LGDYGLAKK.L [191, 199] (missed 1) (rank 1)	Serine/threonine-protein kinase Nek9	NEK9	1.45698		0.899167	0.915819		1.15491	1.05361	0.923932	1.06293	1.05361	1.06293	1.06488	0.170169
K.EFLQEKTLQR.A [297, 306] (missed 1) (rank 3)	Serine/threonine-protein kinase OSR1	OXSR1			0.701923	1.25481			1.06667	0.845528	0.908297		1.21637	0.998933	0.217855
K.TAQALSSGSGSQETKIPISLVLR.L [416, 438] (missed 1) (rank 1)	Serine/threonine-protein kinase OSR1	OXSR1	0.63		0.7				0.775194	0.645161	0.595238		0.740741	0.681056	0.069344
K.IISIFSGTEKGSK.K [52, 64] (missed 1) (rank 4)	Serine/threonine-protein kinase PAK 2	PAK2			0.78071	1.1465			1.48916	0.707207	0.77613	1.43099		1.05512	0.349914
K.FYDSNTVKQK.Y [128, 137] (missed 1) (rank 3)	Serine/threonine-protein kinase PAK 2	PAK2			0.704904	0.998249				0.818638	0.687952		1.60845	0.963639	0.381101
K.EVFAGKIVPK.S [76, 85] (missed 1) (rank 2)	Serine/threonine-protein kinase PLK1	PLK1	0.67		0.63	0.64		0.719424	0.657895	0.324675	0.411523	0.699301	0.342466	0.566143	0.158985
R.DLKLGNLFLNEDLEVK.I [175, 190] (missed 1) (rank 1)	Serine/threonine-protein kinase PLK1	PLK1			0.67	0.91			0.952381	0.295858	0.485437	0.30303	0.485437	0.58602	0.267939
R.DLKPENILLDR.D [171, 181] (rank 1)	Serine/threonine-protein kinase PRKX	PRKX	0.75	0.81	0.76			0.269542	0.735294	0.892857			0.558659	0.682336	0.208057
R.AAGIGKDFK.E [650, 658] (missed 1) (rank 2)	Serine/threonine-protein kinase PRP4 homolog	PRPF4B			1.24	1.56			1.38889				0.735294	1.23105	0.355422
K.DFKENPNLR.D [656, 664] (missed 1) (rank 1)	Serine/threonine-protein kinase PRP4 homolog	PRPF4B			0.94	1.29			0.568182				0.819672	0.904463	0.300098
R.GGDVAVKIFSSR.E [227, 238] (missed 1)	Serine/Threonine-Protein Kinase Receptor R2	ALK4	0.832248		0.817073	1.07297			1.63224		0.791516	1.5339	0.736528	1.0595	0.374123
R.DLKPENILLDSVGHVVLTDFGLCK.E [285, 308] (rank 1)	serine/threonine-protein kinase Sgk3 isoform 2	SGK3	0.92						1.03093		0.877193			0.942707	0.079343
R.DLKTENLLLDGNMDIK.L [148, 163] (missed 1)	Serine/threonine-protein kinase SIK1	SIK1	0.92		0.83				0.671141	0.684932	0.862069		0.980392	0.824756	0.12479
R.DLKPQNILLSNPAGR.R [137, 151] (rank 1)	Serine/threonine-protein kinase ULK1	ULK1				1.35				1.5625	1.96078	1.63934		1.62816	0.253277
R.VKAAQAGR.Q [3, 10] (missed 1) (rank 1)	Serine/threonine-protein kinase VRK1	VRK1			0.6						0.421941		0.694444	0.572128	0.138373
R.FGSDLQKIYEANAK.R [133, 146] (missed 1) (rank 2)	Serine/threonine-protein kinase VRK1	VRK1			0.58					0.403226	0.411523	0.471698		0.466612	0.0815176
K.ESEVKALCAK.A [21, 30] (missed 1) (rank 1)	Serine/threonine-protein phosphatase 4 catalytic subunit	PPP4C	1.12594			1.26626				0.830114	1.19022	1.77629		1.23777	0.343427
R.ITKNVPK.Q [1234, 1240] (missed 1) (rank 1)	serine-protein kinase ATM isoform 2	ATM	1.09		0.95	1.28			0.943396	0.724638	0.943396		0.943396	0.982118	0.16941
K.KIIQQVLQGLDYLHTK.C [190, 205] (missed 1) (rank 2)	SRPK1 74 kDa protein	SRPK1	0.677245		0.579721	1.25697		0.85056	1.20635		0.704471		0.941691	0.888143	0.262965
R.IIHTDIKPENILLSVNEQYIR.R [208, 228] (rank 1)	SRPK1 74 kDa protein	SRPK1	1.29	1.18	1.15	0.94		0.900901	1.42857		0.884956		0.952381	1.09085	0.201978
K.YSKEFFTK.K [585, 592] (missed 1) (rank 1)	SRPK1 74 kDa protein	SRPK1	1.43662	0.676056	0.704225	1.15493		1.47917	0.934211	0.845238	0.959459	1.22414	0.806818	1.02209	0.288534
K.VVKSAQHYTETALDEIK.L [110, 126] (missed 1) (rank 1)	SRPK2 Isoform 1 of Serine/threonine-protein kinase SRPK2	SRPK2				1.3				0.900901	1.08696			1.09595	0.199702
K.LLEREVNILK.S [158, 167] (missed 1) (rank 2)	cDNA FLJ90748 fis, clone PLACE1011824, highly similar to Human Ste20-like kinase (MST2) mRNA	STK33	0.911809		1.10613			0.868831	0.976642				1.23889	1.02046	0.151465
R.DLKLENIMVK.S [237, 246] (missed 1) (rank 1)	cDNA FLJ90748 fis, clone PLACE1011824, highly similar to Human Ste20-like kinase (MST2) mRNA	STK33	1.04294		1.07362			1.55238	0.931429				0.857895	1.09165	0.2717
K.ESGQVVAIKQVPVESDLQEIIK.E [47, 68] (missed 1) (rank 1)	cDNA FLJ90748 fis, clone PLACE1011824, highly similar to Human Ste20-like kinase (MST2) mRNA	STK3			0.545303	0.578554				0.8063	0.61128			0.635359	0.1171
K.TLIEDEIATILKSTLK.G [144, 159] (missed 1) (rank 1)	cDNA FLJ90748 fis, clone PLACE1011824, highly similar to Human Ste20-like kinase (MST2) mRNA	STK3			1.38	0.84				1.16279	1.06383		0.877193	1.06476	0.220616
R.NQAIEELEKSIAVAEAACPGITDK.M [312, 335] (missed 1) (rank 1)	serine/threonine-protein kinase MST4 isoform 3	STK26/MASK			0.711485	1.28291		1.59375	0.72561					1.07844	0.434549
R.DLKPDNILITER.S [359, 370] (rank 1)	Isoform 1 of Serine/threonine-protein kinase 36	STK36			0.872727					1.22222	0.763889			0.952946	0.239465
K.KELLGTYIK.Q [459, 467] (missed 1) (rank 2)	Isoform 1 of Serine/threonine-protein kinase 36	STK36			0.931801	1.07586				1.05583	0.956745			1.00506	0.071394
R.EYLIEKLLTR.T [345, 354] (missed 1) (rank 2)	STE20/SPS1-related proline-alanine-rich protein kinase	STK39				0.92	0.73			0.714286		1.21951		0.895949	0.235097
R.DLKLGNMVLNK.R [196, 206] (missed 1)	Isoform 3 of Serine/threonine-protein kinase 40	STK40			1.61323	0.639702			1.53505	1.04459	1.24884		0.747631	1.13817	0.401297
K.ETGQIVAIKQVPVESDLQEIIK.E [50, 71] (missed 1) (rank 1)	Isoform 3 of Serine/threonine-protein kinase 40	STK40	1.12	0.68	1.28			0.787402	0.609756	0.515464	0.671141	0.606061	0.694444	0.773808	0.255856
R.GELAIKDANAK.L [531, 541] (missed 1) (rank 1)	Tau-tubulin kinase	TTBK2			0.527981	0.928224			1.00797	0.818318	0.84786	0.869841	0.999392	0.857084	0.162347
R.YVLDDQYTSSSGAKFPVK.W [512, 529] (missed 1) (rank 1)	Tyrosine-protein kinase Tec	TEC		1.33	1.13				1.17647			1.13636	0.671141	1.0888	0.247115
K.GTVAIKVVDR.R [35, 44] (missed 1)	Testis-specific serine/threonine-protein kinase 6	TSSK6			0.581921	0.841808				0.634409				0.686046	0.137423
R.TVPEIEKVIEELR.K [75, 87] (missed 1) (rank 1)	TFIIH basal transcription factor complex helicase XPD subunit	ERCC2		1.01124	0.876404				0.960432		0.933566			0.94541	0.0561567
K.CLVIKYAK.D [49, 56] (missed 1) (rank 1)	Thymidine kinase, cytosolic	TK1			0.84			0.724638	0.680272	0.303951	0.330033		0.540541	0.569906	0.218269
R.KLFAPQQILQCSPAN.- [219, 233] (missed 1) (rank 3)	Thymidine kinase, cytosolic	TK1	0.83						0.298507	0.41841	0.37594		0.505051	0.485582	0.206478
K.EKELTELR.N [38, 45] (missed 1) (rank 1)	Isoform 2 of Serine/threonine-protein kinase TNNI3K	CARK	0.74						0.628931	0.462963	0.393701		0.704225	0.585964	0.151372
R.FLSGLELVKQGAEAR.V [31, 45] (missed 1) (rank 1)	TP53-regulating kinase	PRPK	1.32	1.19	0.93		1.01	0.649351	0.847458	0.684932	0.793651	0.769231	0.793651	0.898827	0.217319
K.TPQGLSNLAKTIGQVLAR.M [134, 151] (missed 1) (rank 2)	TP53-regulating kinase	PRPK	1		0.7	1.55				1.17647	0.819672			1.04923	0.333183
R.GEEVAVKIFSSR.E [225, 236] (missed 1)	Transforming Growth Factor Beta Receptor 1	ALK5			1.06564	0.810811			0.784848	0.863333	1.48851		0.981061	0.999033	0.26232
R.LLDADDAAAVAAKCPR.L [33, 48] (missed 1)	Tribbles homolog 1	TRIB1			1.17414	1.00264			0.9475	1.02432	1.26333			1.08239	0.131421
K.LLQTIGKGEFGDVMLGDYR.G [196, 214] (missed 1) (rank 2)	Tyrosine-protein kinase CSK	CSK			0.99	1.08					0.515464	0.598802		0.796067	0.280404
K.VAVKCIK.N [218, 224] (missed 1) (rank 1)	Tyrosine-protein kinase CSK	CSK			0.82	0.92			1.19048	0.588235	0.819672			0.867677	0.217717
K.EASSTQDTGKLPVK.W [337, 350] (missed 1) (rank 3)	Tyrosine-protein kinase CSK	CSK			0.91	1.19				0.980392	1.13636		1.21951	1.08725	0.135369
K.TSVAVKTCK.E [585, 593] (missed 1) (rank 2)	Tyrosine-protein kinase Fer	FER	1.15	0.98		1.33		0.75188	0.877193	0.694444	0.714286		0.70922	0.900878	0.235855
K.KQILR.T [527, 531] (missed 1) (rank 1)	Tyrosine-protein kinase JAK1	JAK1			0.99		0.92			0.617284	0.613497	0.819672	0.900901	0.810226	0.16038
R.YDPLQDNTGEVVAVKK.L [867, 882] (missed 1) (rank 1)	Tyrosine-protein kinase JAK2	JAK2			0.96	0.83				0.806452	1.0989	0.787402		0.896551	0.13175
K.VLGSGAFGKVMNATAYGISK.T [614, 633] (missed 1)	Tyrosine-protein kinase receptor	FLT3			0.9				0.52356	0.507614	0.490196			0.605343	0.19691
K.SSVCAKIVQLLGQNEVDYR.Q [33, 51] (missed 1) (rank 1)	UCK2 Isoform 1 of Uridine-cytidine kinase 2	UCK2			0.59					0.44843	0.561798			0.533409	0.0749327
R.KNPDSQYGELIEKYIK.E [74, 89] (missed 2) (rank 2)	UMP-CMP kinase isoform a	CMPK1			1.18439	1.05653			1.11729	1.16094	0.997315			1.10329	0.0766705
K.EGKIVPVEITISLLK.R [90, 104] (missed 1) (rank 1)	UMP-CMP kinase isoform a	CMPK1	0.783983		0.821918			1.37536	1.00743	0.650892			0.878704	0.919715	0.25189
-.MATSSEEVLLIVKK.V [0, 13] (missed 1) (rank 1)	General Transcription Factor IIH Subunit 3	BTF2			1.12654	0.67718		1.54421		0.645701				0.998408	0.425014
R.YVLDDEYTSSVGSKFPVR.W [544, 561] (missed 1) (rank 1)	Bruton Tyrosine Kinase	BTK/ATK			0.66877	0.914826			1.16544	0.680258	0.905714		1.01603	0.891839	0.192628
R.MLGKGEFGSVR.E [522, 532] (missed 1) (rank 1)	Protein Tyrosine Kinase	BYK			0.754717	0.628931				0.673729	0.883333			0.735177	0.111649
R.HGALTCLCVAMKR.Q [625, 637] (missed 1)	Cell Division Cycle 42	CDC42				1.39806			0.936364	1.19767	1.43056			1.24066	0.227507
R.KAILSPK.E [995, 1001] (missed 1)	Transient Receptor Potential Cation Channel Subfamily M Member 6	CHAK2			0.97					0.78125		1.13636	0.8	0.921903	0.166283
R.ITSVAMKSGGTQLK.L [257, 270] (missed 1)	FAM20C, Golgi Associated Secretory Pathway Kinase	DMP4				1.17				1.19048	1.25			1.20349	0.0415579
K.NLALLKAR.S [35, 42] (missed 1) (rank 2)	Mitogen-Activated Protein Kinase 7	ERK5			0.578278					0.826861	0.824859			0.743332	0.142945
K.NAYKLHTLDTCLK.L [535, 547] (missed 1) (rank 2)	FAKD2 protein	FAKD2			0.88					0.740741	0.606061		0.483092	0.677473	0.171176
K.SPVKTIR.- [208, 214] (missed 1) (rank 1)		IPI:IPI00010865.1|SWISS-PROT:P67870|TREMBL:B0UXA9|ENSEMBL:ENSP00000365025;ENSP00000365026;ENSP00000365042;ENSP00000372919;ENSP00000372925;ENSP00000382980;ENSP00000390900;ENSP00000391038;ENSP00000393756;ENSP00000394855;ENSP00000395275;ENSP00000400188;ENSP00000407018;ENSP00000407379;ENSP00000409510;ENSP00000410802;ENSP00000411322;ENSP00000412520;ENSP00000413469;ENSP00000415237;ENSP00000415303|REFSE…			0.77	1.28				0.8	0.892857			0.935714	0.235407
R.VLLAQPHQGGPAVALK.L [81, 96]		IPI:IPI00396997.3|VEGA:OTTHUMP00000077014			1.01818				0.873016		1.19565			1.02895	0.161587
R.FVLDDQYTSSTGTKFPVK.W [505, 522] (missed 1) (rank 1)	IL2 Inducible T-Cell Kinase	LYK/ITK	1.16125	0.9625							0.973236		1.1782	1.0688	0.116831
R.SVKASHILISVDGK.V [194, 207] (missed 1) (rank 2)	STE20-Related Kinase Adaptor Alpha	LYK5			0.98	0.91			1.25	0.833333	0.934579		0.757576	0.944248	0.16922
K.YSVKVLPWLSPEVLQQNLQGYDAK.S [235, 258] (missed 1) (rank 1)	STE20-Related Kinase Adaptor Alpha	LYK5			0.784425	0.890788			0.702937	0.996216	1.18448	0.928571	1.02332	0.930106	0.159238
K.VAVKNIK.C [258, 264] (missed 1)	Megakaryocyte-Associated Tyrosine Kinase	MATK			0.567766	0.805861			0.979372	0.802941	0.735354			0.778259	0.148295
K.SAIEKLTHDYINLFHFPPLIK.D [401, 421] (missed 1) (rank 1)	Mitogen-Activated Protein Kinase Kinase Kinase 20	MLTK	0.57		0.53				0.952381	0.666667	0.763359	0.526316	0.714286	0.674715	0.153034
K.VLGTGAYGKVFLVR.K [37, 50] (missed 1) (rank 1)	Ribosomal Protein S6 Kinase A4	MSK2			0.87				0.8	0.917431	0.925926		0.617284	0.826128	0.127003
K.LYAMKVLR.K [60, 67] (missed 1) (rank 2)	Ribosomal Protein S6 Kinase A4	MSK2			0.529412					0.748075	0.881971			0.719819	0.17797
R.LQAKDEQGPIR.C [434, 444] (missed 1) (rank 2)	SCY1 Like Pseudokinase 1	NTKL			0.48					0.454545			0.636943	0.523829	0.0987823
R.ELGEGAFGKVFLAECYNLCPEQDK.I [542, 565] (missed 1)	Neurotrophic Receptor Tyrosine Kinase 2	NTRK2			0.78				0.657895				0.546448	0.661448	0.116816
K.MLVAVKALK.D [566, 574] (missed 1)	Neurotrophic Receptor Tyrosine Kinase 3	NTRK3	0.87		0.96					0.384615	0.452489		0.621118	0.657644	0.252231
R.DGTTFPLSLKLK.S [304, 315] (missed 1) (rank 1)	PAS Domain Containing Serine/Threonine Kinase	PASK	0.95		0.97	0.97			0.625	0.543478	0.505051		0.724638	0.755452	0.206362
R.TKNTLQSR.I [551, 558] (missed 1) (rank 1)	PIG31 protein	PIG31				0.9875				0.740741	1.11111		1.31148	1.03771	0.23878
K.FDLKGSTYK.R [251, 259] (missed 1) (rank 2)	Phosphatidylinositol-4-Phosphate 5-Kinase Type 1 Gamma	PIP5K1C			1.02	0.91				0.70922	0.653595		0.724638	0.80349	0.154753
R.GSAHLVALKCIPK.K [52, 64] (missed 1)	Pregnancy Up-Regulated Nonubiquitous CaM Kinase	PNCK			0.42	0.51				0.543478	0.662252			0.533932	0.100184
K.VLLSEFRPSGELFAIKALK.K [628, 646] (missed 1) (rank 1)	Protein Kinase N1	PRKCL1			0.93				0.869565	0.632911				0.810826	0.157013
K.KIQGLELQQIK.T [255, 265] (missed 1)	PX Domain Containing Serine/Threonine Kinase Like	PXK				1.2			0.787402		0.943396			0.976933	0.208334
K.INVAVKTCK.K [451, 459] (missed 1)	Protein Tyrosine Kinase 2 Beta	RAFTK			0.44	0.83				0.444444	0.406504		0.460829	0.516356	0.17644
R.DVYEEDSYVKR.S [897, 907] (missed 1)	Ret Proto-Oncogene	RET	0.607102			1.12666			0.810477		1.18891	0.839423		0.914514	0.240449
K.VAVKTLKK.G [1976, 1983] (missed 2)	ROS Proto-Oncogene 1, Receptor Tyrosine Kinase	ROS1			1.08					0.869565	0.892857			0.947474	0.11536
R.DLKPENVVFFEK.Q [138, 149] (rank 1)	SNF Related Kinase	SNFRK			1.0678						0.942922	1.14722		1.05265	0.102989
R.SAGKWPLK.W [496, 503] (missed 1) (rank 1)	Ribosomal Protein S6 Kinase B2	SRK			1.04	0.92				0.990099	1.23457			1.04617	0.134901
K.GPSVPFSIFDEFLLSEKK.N [522, 539] (missed 1) (rank 1)	BUB1 Mitotic Checkpoint Serine/Threonine Kinase B	SSK1			1.32	1.22						0.990099		1.1767	0.169159
R.DIKPENLLLGFR.G [165, 176]	Aurora Kinase C	STK13/AURKC		0.81	0.76	0.92	0.39		0.763359	0.75188	0.806452	0.657895	0.75188	0.734607	0.146596
K.IFAMKVLK.K [118, 125] (missed 1) (rank 1)	Ribosomal Protein S6 Kinase B1	STK14A			0.638806	0.859701				0.74115	0.867876			0.776883	0.108751
R.DLKPENIMLNHQGHVK.L [217, 232] (rank 2)	Ribosomal Protein S6 Kinase B1	STK14A				0.78				0.787402	0.653595			0.740332	0.0752079
R.DLKPENIMLSSQGHIK.L [193, 208] (rank 1)	Ribosomal Protein S6 Kinase B2	STK14B	0.62		0.78	0.85		0.505051	0.884956	0.961538	0.775194	0.625		0.750217	0.154467
K.ETSVLAAAKVIDTK.S [54, 67] (missed 1) (rank 2)	NIMA Related Kinase 4	STK2/SLK			1.09	1.3			1.08696				0.552486	1.00736	0.319225
R.DLKAGNILFTLDGDIK.L [154, 169] (missed 1) (rank 1)	NIMA Related Kinase 4	STK2/SLK	1.3	1.32	0.83	1.15		0.943396	0.900901	0.775194	0.909091	0.813008	0.840336	0.978193	0.203123
R.DLKCENLLLDK.D [135, 145] (missed 1)	Testis Specific Serine Kinase 2	STK22B/TSSK2			0.981818	0.818182			0.654762	2.03704	1.52778		0.654762	1.11239	0.556772
K.TGDLFAIKVFNNISFLRPVDVQMR.E [30, 53] (missed 1) (rank 1)	TANK Binding Kinase 1	TBK1				0.977742			0.914244	0.814767	1.4263			1.03326	0.270475
R.AGKSTQSR.K [16, 23] (missed 1) (rank 1)	Deoxythymidylate Kinase	TMPK				1.11937			1.022	1.26485	0.899648			1.07647	0.154447
R.STEIGKLLSSYLQK.K [45, 58] (missed 1) (rank 3)	Deoxythymidylate Kinase	TMPK			1.08034				1.23941		0.75		1.28289	1.08816	0.241668
K.LLSSYLQKK.S [51, 59] (missed 1) (rank 2)	Deoxythymidylate Kinase	TMPK			1.00719				1.12703	0.829851	0.846701		1.39	1.04015	0.230585
K.SVPVAVKSLR.V [141, 150] (missed 1)	Tyrosine Kinase Non Receptor 1	TNK1				1.54				1.69492			2.27273	1.83588	0.386168
K.IIKNPMDLSTIK.K [937, 948] (missed 1) (rank 1)	Tripartite Motif Containing 24	TRIM24	0.98	1.12	1.05				0.826446	1.21951	1.07527			1.0452	0.133425
K.IGDFGLAKAVPEGHEYYR.V [1038, 1055] (missed 1) (rank 1)	Tyrosine Kinase 2	TYK2				1.24				0.952381	1.06383			1.0854	0.145018
R.GSFKTVYR.G [182, 189] (missed 1) (rank 1)	WNK Lysine Deficient Protein Kinase 4	WNK4			1.57288	1.24746					1.60326		1.79878	1.5556	0.228516

## Sheet: Imatinib PRM
Peptide	Gene full name	Gene	F4	F2	F3	1/R1	1/R2	avg	std dev
R.AHLGEVLEAVR.Y [392, 402] (rank 1)	Isoform 3 of Triple functional domain protein	TRIO	0.17	0.04		0.04		0.0833333	0.0750555
R.LDPTLSVDDLANSGQVGTAR.Y [403, 422] (rank 1)	Isoform 1 of TGF-beta receptor type-2	TGFBR2		0.14				0.14
K.DVVTLLAEGLR.E [163, 173] (rank 1)	Branched chain ketoacid dehydrogenase kinase, isoform CRA_a	BCKDK			0.37			0.37
R.YMAPEVLDDSINMK.H [377, 390] (rank 1)	TGF-beta receptor type-1	TGFBR1	0.45		0.35			0.4	0.0707107
R.LGCHGGGSQEVK.E [436, 447] (rank 2)	Beta-adrenergic receptor kinase 2	ADRBK2				0.413223		0.413223
K.TQNILLDNEFHVK.I [148, 160] (rank 2)	Isoform 1 of Receptor-interacting serine/threonine-protein kinase 2	RIPK2	0.42					0.42
R.LSDDTLLDIMR.R [30, 40] (rank 1)	Isoform 1 of Putative hexokinase HKDC1	HKDC1					0.531915	0.531915
R.MGIFPESLAR.F [796, 805] (rank 1)	Isoform 1 of Serine/threonine-protein kinase LATS1	LATS1	0.54					0.54
K.INPICNDHYR.S [65, 74] (rank 2)	PBK cDNA FLJ58333, highly similar to T-lymphokine-activated killer cell-originated protein kinase	PBK	0.57	0.49	0.66	0.625		0.58625	0.0740917
R.IQSYSPQAFK.F [630, 639] (rank 2)	Isoform 1 of Serine/threonine-protein kinase LATS1	LATS1	0.62					0.62
K.LFVDTDADTR.L [152, 161] (rank 2)	Isoform 1 of Uridine-cytidine kinase 2	UCK2	0.77	0.44	0.59	0.806452	0.628931	0.647076	0.14746
R.DVVAPYQTLLNPLSK.L [219, 233] (rank 1)	Transient receptor potential cation channel subfamily M member 7	TRPM7		0.69				0.69
R.GTGSSSSGVLMVGPNFR.V [27, 43] (rank 1)	Isoform 1 of Casein kinase I isoform gamma-3	CSNK1G3					0.704225	0.704225
R.VLVGGLR.A [429, 435] (rank 1)	Isoform 2 of Ephrin type-B receptor 6	EPHB6	0.66		0.7	0.729927	0.826446	0.729093	0.0709427
R.YQNLKPIGSGAQGIVCAAYDAILER.N [25, 49] (rank 2)	Isoform 1 of Mitogen-activated protein kinase 8	MAPK8	0.73		0.75	0.787402	0.826446	0.773462	0.0425874
K.IDETGSTPGYEGEGEGDKNISR.K [823, 844] (missed 1) (rank 1)	Isoform 1 of Neuropilin-1	NRP1		0.81				0.81
K.VPALLENQVEER.T [240, 251] (rank 1)	serine/threonine-protein kinase RIO1 isoform 2	RIOK1	0.73	0.72	0.89	0.826446	0.884956	0.81028	0.0818359
R.ATAAECLR.H [640, 647] (rank 1)	SRPK1 74 kDa protein	SRPK1	0.74	0.82	0.93	0.840336	0.854701	0.837007	0.0683218
K.VSLPLFDFK.R [790, 798] (rank 1)	Phosphatidylinositol-4-phosphate 3-kinase C2 domain-containing subunit alpha	PIK3C2A			0.93	0.854701	0.729927	0.838209	0.101051
R.DFDFVSER.F [877, 884] (rank 1)	Serine/threonine-protein kinase N3	PKN3	0.83			0.847458		0.838729	0.0123444
K.MMQGGVGIPTIR.W [57, 68] (rank 3)	Isoform 1 of Casein kinase I isoform delta	CSNK1D			0.84	0.854701		0.84735	0.0103951
K.QTGYLTIGGQR.Y [101, 111] (rank 1)	Isoform 1 of Dual specificity mitogen-activated protein kinase kinase 7	MAP2K7	0.83		0.66	0.892857	1.0101	0.84824	0.14601
K.AITPPQQPYK.K [689, 698] (rank 1)	Isoform 1 of Cell division protein kinase 12	CDK12			1	0.724638		0.862319	0.194711
K.IILVIGGPGSGK.G [109, 120] (rank 1)	AK5 cDNA FLJ33648 fis, clone BRAMY2024449, weakly similar to ADENYLATE KINASE ISOENZYME 1	AK5	1.08	0.89			0.628931	0.86631	0.226466
K.IADFGVSNEFK.G [327, 337] (rank 1)	Isoform 3 of Calcium/calmodulin-dependent protein kinase kinase 2	CAMKK2			0.84	0.892857		0.866429	0.0373756
K.DLLQQLLPK.F [93, 101] (rank 3)	General transcription factor IIH subunit 1	GTF2H1	0.76	0.88	1.09	0.680272	0.980392	0.878133	0.164661
K.VLVMLAAQSR.R [271, 280] (rank 3)	cDNA FLJ56153, highly similar to Homo sapiens transforming growth factor beta regulator 4 (TBRG4), transcript variant 1, mRNA	TBRG4	0.94	0.75	1.01	0.847458	0.854701	0.880432	0.0988662
R.VVDELDNQMR.E [60, 69] (rank 1)	Isoform 1 of Adenylate kinase isoenzyme 6	AK6	0.79	1.05	0.99	0.757576	0.819672	0.88145	0.130112
K.SISQLESLNR.E [573, 582] (rank 1)	Rho-associated protein kinase 1	ROCK1	0.8		0.87	0.980392		0.883464	0.0909466
K.EFLGENYVHYGEVVQLPLEFVK.Q [64, 85] (rank 2)	Inositol-pentakisphosphate 2-kinase	IPPK	0.7			1.04167	0.917431	0.886366	0.172939
R.VLQQLQQGDWR.L [451, 461] (rank 1)	Isoform 3 of BMP-2-inducible protein kinase	BMP2K	0.79	0.78	0.8	1.06383	1	0.886766	0.134596
R.HAQTVETLLR.H [794, 803] (rank 1)	Isoform 1 of Receptor-interacting serine/threonine-protein kinase 4	RIPK4		0.81	0.98			0.895	0.120208
K.GYPSEFATYLNFCR.S [242, 255] (rank 1)	Isoform 1 of Casein kinase I isoform delta	CSNK1D	1.09	0.79	0.84	0.854701	0.900901	0.89512	0.115903
R.GAPVNISSSDLTGR.Q [375, 388] (rank 2)	Isoform 1 of Casein kinase I isoform delta	CSNK1D	1.22		0.78	0.694444		0.898148	0.281995
R.SLPSLEDIDPDVLDSMHSLGCFR.D [290, 312] (rank 1)	Isoform 3 of BR serine/threonine-protein kinase 2	BRSK2	0.73	1.07				0.9	0.240416
R.DLVEPWVVVR.G [384, 393] (rank 2)	Ephrin receptor	EPHB4	0.72	0.7	1.28	0.862069	0.943396	0.901093	0.234583
R.LGAQSIQPTANLDR.T [861, 874] (rank 1)	Isoform 1 of Protein-tyrosine kinase 2-beta	PTK2B	1.02	0.98	0.91	0.819672	0.8	0.905934	0.096406
K.YSSSQPEPR.T [313, 321] (rank 1)	Serine/threonine-protein kinase Chk1	CHEK1	0.99	0.96		0.869565	0.819672	0.909809	0.0789387
K.TVYEGPFASR.S [391, 400] (rank 1)	Inhibitor of nuclear factor kappa-B kinase subunit alpha	CHUK		0.91				0.91
K.AGANITPR.E [492, 499] (rank 1)	Serine/threonine-protein kinase PLK1	PLK1	0.91					0.91
R.LTDPIPTTETSIAPR.Q [352, 366] (rank 1)	Isoform 2 of AP2-associated protein kinase 1	AAK1	0.84		0.83	1.03093	0.952381	0.913327	0.0960476
R.TSLPWQGLK.A [216, 224] (rank 2)	Isoform 1 of Casein kinase I isoform alpha	CSNK1A1	1.35	0.86		0.628931	0.833333	0.918066	0.305896
K.LFTEVEGTCTGK.Y [29, 40] (rank 1)	DNA-directed RNA polymerase II subunit RPB7	POLR2G	0.77	0.74	0.74	1.06383	1.28205	0.919176	0.244471
K.IYGDGNAVPR.I [359, 368] (rank 2)	Bifunctional UDP-N-acetylglucosamine 2-epimerase/N-acetylmannosamine kinase	GNE	1.36	0.72		0.78125	0.833333	0.923646	0.294567
K.IVDLNFLIGPK.L [476, 486] (rank 1)	TFIIH basal transcription factor complex helicase XPB subunit	ERCC3		0.79	1.06			0.925	0.190919
R.AALQLVVDPGDPR.S [305, 317] (rank 2)	Isoform 1 of Serine/threonine-protein kinase PAK 4	PAK4	0.7	0.84	0.97	1.05263	1.06383	0.925292	0.154465
K.VLLSEFR.P [628, 634] (rank 1)	Isoform 1 of Serine/threonine-protein kinase N1	PKN1	0.84		0.96		0.980392	0.926797	0.0758571
K.LLNYAPLEK.- [58, 66] (rank 1)	DNA-directed RNA polymerases I, II, and III subunit RPABC5	POLR2L	1.09	0.97	0.82	0.909091	0.854701	0.928758	0.106536
R.VGEAPGLQQPQPR.G [7, 19] (rank 3)	Isoform IB of Tyrosine-protein kinase ABL2	ABL2	0.86	1.09	0.94	0.819672	0.934579	0.92885	0.103425
K.GLLGSADK.G [512, 519] (rank 1)	TBRG4 cDNA FLJ56153, highly similar to Homo sapiens transforming growth factor beta regulator 4 (TBRG4), transcript variant 1, mRNA	TBRG4	1	0.75	0.91	1.04167	0.952381	0.93081	0.112547
R.EYQELMNVK.L [562, 570] (rank 1)	Tau-tubulin kinase	TTBK2	0.9	0.94	1.11	0.943396	0.769231	0.932525	0.121855
R.LDILLGTAR.A [315, 323] (rank 1)	interleukin-1 receptor-associated kinase 1 isoform 3	IRAK1		0.96	0.81	1.0989	0.869565	0.934617	0.125691
K.LLAEPAGGLVGER.T [340, 352] (rank 3)	Isoform 1 of Inositol-tetrakisphosphate 1-kinase	ITPK1	0.95		0.94	0.900901	0.961538	0.93811	0.0263208
R.NSTSSIEPR.L [623, 631] (rank 1)	mitogen-activated protein kinase kinase kinase kinase 4 isoform 3	MAP4K4			1.03	0.847458		0.938729	0.129077
R.AHCAICTDR.I [151, 159] (rank 1)	Protein kinase C iota type	PRKCI	0.8		1.08			0.94	0.19799
K.EEVTELLAR.Y [153, 161] (rank 2)	DNA-directed RNA polymerases I, II, and III subunit RPABC1	POLR2E	0.73	0.82	0.66	1.26582	1.23457	0.942078	0.287145
K.YGEMPVDK.A [131, 138] (rank 2)	Integrin-linked protein kinase	ILK			1.2		0.684932	0.942466	0.364208
R.HNLEQDLVR.E [626, 634] (rank 1)	Isoform 1 of Serine/threonine-protein kinase TAO1	TAOK1			1.13		0.757576	0.943788	0.263344
K.DLPSDPER.L [629, 636] (rank 1)	Isoform 1 of Mitotic checkpoint serine/threonine-protein kinase BUB1 beta	BUB1B	0.98	0.81	0.93	1.07527	0.934579	0.94597	0.09585
K.VGELKDDDFEK.I [59, 69] (missed 1) (rank 4)	Dual specificity mitogen-activated protein kinase kinase 1	MAP2K1	0.91	0.76	0.98	1.11111	0.970874	0.946397	0.127404
K.LLPPFKPQVTSEVDTR.Y [421, 436] (rank 1)	RAC-beta serine/threonine-protein kinase	AKT2	0.76				1.13636	0.948182	0.266129
K.SIAVAEAACPGITDK.M [321, 335] (rank 1)	STK3;MST4 serine/threonine-protein kinase MST4 isoform 3	STK26	0.83	0.78	0.88	1.13636	1.1236	0.949992	0.168127
R.RPPGPDLSPDGPR.S [565, 577] (rank 1)	Isoform 1 of Fibroblast growth factor receptor 4	FGFR4		0.95				0.95
K.QIALAVLSTELAVR.K [874, 887] (rank 2)	CAD protein	CAD	1.05	1.06	1.15	0.724638	0.769231	0.950774	0.190763
K.EPFFHGHDNYDQLVR.I [229, 243] (rank 2)	CSNK2A1 protein	CSNK2A1	0.86		0.77	1.16279	1.02041	0.9533	0.173871
R.TDTNVLYER.L [96, 104] (rank 2)	Isoform 1 of Adenylate kinase isoenzyme 6	AK6	0.98	1.18	1.13	0.8	0.680272	0.954054	0.212938
R.GYASPDLSK.L [563, 571] (rank 3)	Isoform 1 of RAF proto-oncogene serine/threonine-protein kinase	RAF1	0.95		0.84		1.07527	0.95509	0.117717
K.HINEVYYAK.K [57, 65] (rank 1)	Isoform 1 of Dual specificity tyrosine-phosphorylation-regulated kinase 1B	DYRK1B			0.94		0.970874	0.955437	0.0218311
K.VYSLIQSLTSQIR.H [665, 677] (rank 1)	Isoform 2 of Inositol hexakisphosphate and diphosphoinositol-pentakisphosphate kinase 2	PPIP5K2	1.16	0.87	1.08	0.833333	0.840336	0.956734	0.152324
K.GGFGEVCACQVR.A [194, 205] (rank 2)	Isoform GRK6A of G protein-coupled receptor kinase 6	GRK6	0.95		1.2	0.719424	0.961538	0.957741	0.196264
R.LSDGDMTSALR.G [516, 526] (rank 1)	Isoform 2 of ATR-interacting protein	ATRIP	1.01	0.95	1.25	0.970874	0.632911	0.962757	0.220095
R.ETHEIVALK.R [24, 32] (rank 1)	Cell division protein kinase 5	CDK5	0.93		1.14	0.826446		0.965482	0.15976
K.LFLYDLPEGK.S [1125, 1134] (rank 1)	Serine/threonine-protein kinase MRCK beta	CDC42BPB	0.9	1.04				0.97	0.0989949
R.VPFLPGDSDLDQLTR.I [209, 223] (rank 1)	Cell division protein kinase 7	CDK7	1.28	0.82	1.12	0.854701	0.78125	0.97119	0.217953
R.EFLQQQYR.L [133, 140] (rank 1)	Mitotic checkpoint serine/threonine-protein kinase BUB1	BUB1	1.02			0.952381	0.943396	0.971926	0.0418752
K.EELLFGGK.L [315, 322] (rank 2)	Hexokinase-2	HK2	0.96	0.92	1.03	0.793651	1.16279	0.973288	0.136394
R.NLGFETSAFK.L [699, 708] (rank 1)	Isoform 1 of Phosphatidylinositol 4-kinase beta	PI4KB	0.86			1.08696		0.973478	0.160482
K.DQLVGLGR.T [1042, 1049] (rank 1)	Elongator complex protein 1	IKBKAP	0.85	0.77	0.89	1.2987	1.06383	0.974506	0.210682
R.TIVSIGDPK.K [237, 245] (rank 1)	PAK2 Serine/threonine-protein kinase PAK 2	PAK2	0.98	0.83	1.05	1.08696	0.934579	0.976307	0.101038
K.LFPDVLFPADSEHNK.L [273, 287] (rank 1)	Isoform 1 of Mitogen-activated protein kinase 8	MAPK8	1.09	0.95	1.1	0.990099	0.757576	0.977535	0.138694
K.YNIELDPR.F [260, 267] (rank 1)	CSNK2A1 protein	CSNK2A1	1.05	1.03	0.99	0.787402	1.03093	0.977666	0.108582
K.LPFLGLALSSR.K [101, 111] (rank 1)	TFIIH basal transcription factor complex helicase XPD subunit	ERCC2	0.9	1.12	1.06	0.884956	0.925926	0.978176	0.105286
K.FSNQETSVEIGESVR.G [34, 48] (rank 1)	Isoform 1 of Ribose-phosphate pyrophosphokinase 2	PRPS2	0.91	0.94	0.98	1	1.06383	0.978766	0.0589911
K.SCTFDEQR.T [168, 175] (rank 1)	Serine/threonine-protein kinase 12	AURKB	1.02		0.94			0.98	0.0565685
K.ELLVDCYKPTEAFISGLLDK.I [653, 672] (rank 1)	LIM domain kinase 2 isoform 1	LIMK2	1.15	0.72	1.35	0.75188	0.952381	0.984852	0.267434
R.ATTPADGEEPAPEAEALAAAR.E [5, 25] (rank 4)	TP53-regulating kinase	PRPK	0.85	0.74	0.78	1.25	1.31579	0.987158	0.273815
R.GFVLYPVK.Y [63, 70] (rank 2)	DNA-directed RNA polymerase II subunit RPB7	POLR2G		0.86	1.32	0.862069	0.925926	0.991999	0.220798
K.LQQENSILR.N [1501, 1509] (rank 1)	Isoform 3 of Ninein	NIN	0.97	0.92	0.97	1.06383	1.04167	0.993099	0.0586776
R.AQFDTLQK.L [227, 234] (rank 1)	Proto-oncogene tyrosine-protein kinase Yes	YES1	1			0.990099		0.99505	0.00700106
R.IPEQILGK.V [160, 167] (rank 3)	Dual specificity mitogen-activated protein kinase kinase 1	MAP2K1	1.08	0.91	0.98	1.0101	1	0.99602	0.0610795
R.FCIDSENR.I [360, 367] (rank 1)	Serine/threonine-protein kinase 38-like	STK38L	0.93			1.06383		0.996915	0.094632
R.ILGTPDYLAPELLLGR.A [737, 752] (rank 1)	Isoform 1 of Microtubule-associated serine/threonine-protein kinase-like	MASTL	0.71		0.8	1.14943	1.33333	0.99819	0.292988
R.LAELQEQLR.A [519, 527] (rank 2)	Isoform 1 of Bromodomain-containing protein 2	BRD2	0.94		0.97	1.08696		0.998986	0.0776478
K.EPIRSTGFILDGFPR.Y [192, 206] (missed 1) (rank 1)	Isoform 5 of Adenylate kinase domain-containing protein 1	AK9	1.02	1.18	1.08	0.892857	0.826446	0.999861	0.142127
R.ILISDAK.G [1653, 1659] (rank 1)	Tyrosine-protein kinase SgK269	PEAK1	0.89	0.81	1	1.28205	1.02041	1.00049	0.179003
K.ECWYQNPSAR.L [475, 484] (rank 2)	Activin receptor type-1	ACVR1	0.98		0.97	1.05263		1.00088	0.0450986
R.GEFPYLGR.L [39, 46] (rank 1)	Isoform 4 of Membrane-associated guanylate kinase, WW and PDZ domain-containing protein 3	MAGI3	1.17				0.833333	1.00167	0.238059
R.STYCLLNGLTDR.D [157, 168] (rank 1)	DNA-directed RNA polymerase II subunit RPB2	POLR2B	0.96	0.68		1.05263	1.31579	1.00211	0.262345
K.AIQEPDDAR.D [120, 128] (rank 3)	Dual specificity protein kinase TTK	TTK	0.87	0.72	0.85	1.20482	1.36986	1.00294	0.272262
K.VFGEDSVGVIFK.N [793, 804] (rank 2)	Phosphatidylinositol-4,5-bisphosphate 3-kinase catalytic subunit beta isoform	PIK3CB	0.97		0.93	0.877193	1.23457	1.00294	0.159027
R.DRPLEADGQEVPLDTSGSQAR.P [70, 90] (rank 1)	CAMKK beta protein	CAMKK2	1.41	0.48			1.1236	1.00453	0.476295
K.EVLDSETLCR.R [64, 73] (rank 2)	Serine/threonine-protein kinase 11	STK11	0.77		1.24			1.005	0.33234
K.DISDIEGEK.D [337, 345] (rank 1)	Hexokinase-2	HK2	1.12		0.67	1.2987	0.934579	1.00582	0.268742
K.TLIEDEIATILK.S [144, 155] (rank 1)	STK3 cDNA FLJ16404 fis, clone UTERU2008019, highly similar to Serine/threonine-protein kinase 3	STK3	1.1		1.11	0.729927	1.08696	1.00672	0.18477
R.DVKPENFLVGR.P [164, 174] (rank 1)	Casein kinase I isoform gamma-2	CSNK1G2	1.01					1.01
R.AGDVEEDASQLIFPK.E [9, 23] (rank 2)	DNA-directed RNA polymerase II subunit RPB4	POLR2D	1.14		0.89	1		1.01	0.1253
R.ILQEEGIDLPR.Y [150, 160] (rank 1)	Isoform 7 of Inositol hexakisphosphate and diphosphoinositol-pentakisphosphate kinase 1	PPIP5K1			1.01			1.01
K.ILLLLEEK.E [2375, 2382] (rank 2)	Isoform 2 of A-kinase anchor protein 13	APAK13	1.01		1.23	0.934579	0.877193	1.01294	0.154587
R.LLYPPETGLFLVR.E [94, 106] (rank 3)	Tyrosine-protein kinase CSK	CSK	1.02	0.94	1.09	0.990099	1.03093	1.01421	0.0551035
K.AQEESTGLLSGLR.I [81, 93] (rank 3)	General transcription factor IIH subunit 4	GTF2H4	1.46			0.757576	0.826446	1.01467	0.387198
R.VLVQGARSEER.R [189, 199] (missed 1) (rank 1)	Isoform 1 of Inositol-trisphosphate 3-kinase B	ITPKB		1.01		1.02002		1.01501	0.00708522
R.DILLQGLK.A [321, 328] (rank 1)	Serine/threonine-protein kinase VRK1	VRK1			0.81	1.22222		1.01611	0.291485
R.AVILGPPGSGK.G [7, 17] (rank 2)	Adenylate kinase isoenzyme 4, mitochondrial	AK4	0.74		1.44	0.869565		1.01652	0.372421
K.EAFAIGLGGGSASGK.T [96, 110] (rank 3)	Isoform 2 of Uridine-cytidine kinase-like 1	UCKL1	1.23	0.9		0.925926		1.01864	0.1835
K.ELGTGQFGVVK.Y [406, 416] (rank 2)	Tyrosine-protein kinase BTK	BTK	1.12	1.23	0.89	0.952381	0.909091	1.02029	0.148217
R.LLQVDPEAR.L [270, 278] (rank 2)	Phosphorylase b kinase gamma catalytic chain, testis/liver isoform	PHKG2	0.88	0.86	1.15	1.05263	1.16279	1.02108	0.144523
R.VMVVGPTDVGK.S [116, 126] (rank 1)	Polyribonucleotide 5'-hydroxyl-kinase Clp1	CLP1	1.14	1.29	0.96	0.862069	0.854701	1.02135	0.18918
R.LGDFFGDPGNPPEFNPSGSK.D [77, 96] (rank 2)	General transcription factor IIH subunit 3	GTF2H3	0.9		0.96	1	1.23457	1.02364	0.1465
K.YIHSADIIHR.D [139, 148] (rank 2)	Isoform CSBP2 of Mitogen-activated protein kinase 14	MAPK14	0.64		0.92		1.51515	1.02505	0.446933
K.HDEVVCGR.K [165, 172] (rank 1)	Isoform 1 of Serine/threonine-protein kinase RIO3	RIOK3	0.94				1.11111	1.02556	0.120994
K.GGLVWDENSSDGR.Y [386, 398] (rank 3)	Isoform 3 of Dual specificity protein kinase CLK3	CLK3	1.26				0.8	1.03	0.325269
R.SADAGSFSPTPGQIGGAVK.L [1545, 1563] (rank 2)	Phosphatidylinositol-4-phosphate 3-kinase C2 domain-containing subunit alpha	PIK3C2A	1.03					1.03
K.TQPVPESQLLPGQR.F [20, 33] (rank 1)	Isoform LYN B of Tyrosine-protein kinase Lyn	LYN	1.29	0.95	1.14	0.917431	0.854701	1.03043	0.179931
R.FTVQMPTSQSPAVK.A [186, 199] (rank 1)	Transcription initiation factor TFIID subunit 9	TAF9					1.03093	1.03093
R.FQFPAQVTDVSENAK.D [300, 314] (rank 1)	Isoform 5 of Serine/threonine-protein kinase MRCK alpha	CDC42BPA	1.14	1.27	1.07	0.970874	0.714286	1.03303	0.208821
K.IGEGGFGCVYR.A [217, 227] (rank 4)	interleukin-1 receptor-associated kinase 1 isoform 3	IRAK1	0.87	1.23	1.3	1.06383	0.704225	1.03361	0.247845
R.KPFDEIGGPAFR.I [226, 237] (rank 1)	Isoform 1A of Mitogen-activated protein kinase kinase kinase 7	MAP3K7	1.35		0.79		0.961538	1.03385	0.286917
K.MTDEEIMEK.L [226, 234] (rank 3)	Serine/threonine-protein kinase PAK 2	PAK2	1.08	1.07	1.01	1.13636	0.877193	1.03471	0.0988082
R.VEELDESR.H [287, 294] (rank 1)	Serine/threonine-protein kinase NLK	NLK			1.08	0.980392	1.05263	1.03767	0.0514608
K.EAYDSTLPLIK.T [519, 529] (rank 2)	CDC42 binding protein kinase alpha	CDC42BPA	1.19		1.1	0.943396	0.917431	1.03771	0.129659
K.VTTVVATLGQGPER.S [99, 112] (rank 2)	Glycogen synthase kinase-3 alpha	GSK3A	1.12	0.98	1.13	0.980392	0.980392	1.03816	0.0793555
R.TVYCNVHK.H [205, 212] (rank 4)	Isoform 1 of Transcription intermediary factor 1-beta	TRIM28	0.9	1.06	1.13	1.06383		1.03846	0.0977383
K.VVDPTPEQFQAFR.N [378, 390] (rank 1)	Isoform 1 of RAF proto-oncogene serine/threonine-protein kinase	RAF1	0.79		1.13	1.0989	1.13636	1.03882	0.166683
K.TADDFLNR.I [189, 196] (rank 1)	Cyclin-H	CCNH	1.04		0.96	0.909091	1.25	1.03977	0.150152
R.LHCESESFK.M [27, 35] (rank 2)	DNA-directed RNA polymerases I, II, and III subunit RPABC3	POLR2H	1	1.12	1.27		0.775194	1.0413	0.208978
R.MGIFPESLAR.F [796, 805] (rank 1)	Isoform 1 of Serine/threonine-protein kinase LATS1	LATS1					1.04167	1.04167
K.FLIDGFPR.N [120, 127] (rank 1)	UMP-CMP kinase isoform a	CMPK1	1.2	0.95	1.09	0.961538	1.0101	1.04233	0.103951
K.LPSGVFSLEFQDFVNK.C [324, 339] (rank 2)	Dual specificity mitogen-activated protein kinase kinase 1	MAP2K1	1.12		1.14	0.869565		1.04319	0.150694
R.ILYPEIPR.K [193, 200] (rank 2)	Bifunctional polynucleotide phosphatase/kinase	PNKP		1.07	1.06	1		1.04333	0.0378594
K.VLLAEYK.N [670, 676] (rank 4)	Serine/threonine-protein kinase N2	PKN2	0.72				1.36986	1.04493	0.459523
R.MLLAHVDLIEK.L [47, 57] (rank 2)	DNA-directed RNA polymerases I, II, and III subunit RPABC5	POLR2L	0.83		1.18	0.980392	1.19048	1.04522	0.173
R.TNADVMTALSQGYR.M [447, 460] (rank 1)	Isoform LYN A of Tyrosine-protein kinase Lyn	LYN	1.1		1.31	0.833333	0.943396	1.04668	0.206853
K.KLDEDSLTK.Q [15, 23] (missed 1) (rank 1)	Isoform 1 of Serine/threonine-protein kinase 4	STK4	1.32		1.29	0.70922	0.869565	1.0472	0.305044
K.GDPFATLSAR.P [735, 744] (rank 2)	Isoform 4 of N-terminal kinase-like protein	SCYL1	0.86		1.43	1.03093	0.869565	1.04762	0.266707
R.LAYAENIALLAETALR.F [479, 494] (rank 1)	Phosphoinositide 3-kinase regulatory subunit 4	PIK3R4	1.26	0.9	0.92	0.990099	1.17647	1.04931	0.160531
R.IAVMSFPAEGVESALK.N [416, 431] (rank 1)	Cyclin-G-associated kinase	GAK	1.15	0.93	0.96	1.03093	1.17647	1.04948	0.110518
K.TVIVAALDGTFQR.K [117, 129] (rank 1)	Thymidine kinase, cytosolic	TK1		1.07	0.91		1.17647	1.05216	0.134128
R.QLLLTEGPHLYYVDPVNK.V [474, 491] (rank 2)	Isoform 1 of 3-phosphoinositide-dependent protein kinase 1	PDPK1	0.87				1.23457	1.05228	0.257788
R.VAVLCVSR.S [633, 640] (rank 1)	Isoform 1 of FAST kinase domain-containing protein 2	FASTKD2	0.81		0.96	1.40845	1.03093	1.05234	0.254643
K.YYIDPSTYEDPCQAIR.E [628, 643] (rank 1)	Isoform 2 of Ephrin type-B receptor 6	EPHB6		0.96			1.14943	1.05471	0.133944
R.GQIQVILGPMFSGK.S [18, 31] (rank 3)	Thymidine kinase, cytosolic	TK1	1.2	0.9	1.14	1.06383	0.970874	1.05494	0.121892
K.LPVSVPMPIAR.P [197, 207] (rank 2)	Isoform 1 of Mitogen-activated protein kinase kinase kinase 4	MAP3K4	1	0.74	0.92	1.49254	1.1236	1.05523	0.281345
R.LLLFDAPDLR.L [977, 986] (rank 3)	Serine/threonine-protein kinase MRCK gamma	CDC42BPG	1.17		0.75	1.25		1.05667	0.268576
K.ILLPEPSIR.S [31, 39] (rank 1)	Beta-adrenergic receptor kinase 1	ADRBK1	1.13		1.02	1.02041		1.0568	0.063391
R.ELAICTVGR.L [708, 716] (rank 1)	Serine/threonine-protein kinase mTOR	MTOR	1.11		0.95		1.11111	1.05704	0.0926985
R.FGSLTMDGGLR.N [713, 723] (rank 3)	Serine/threonine-protein kinase TBK1	TBK1	1.02	1.05	0.86	1.28205	1.07527	1.05746	0.151003
K.YQQGDFGYCPR.V [100, 110] (rank 2)	Casein kinase II subunit beta	CSNK2B	1	1.04	1.15	1.03093	1.07527	1.05924	0.0573921
R.AADLLVNPLDPR.N [507, 518] (rank 2)	Isoform 1 of Serine/threonine-protein kinase SRPK2	SRPK2	0.8	1.11	1.1	1.0989	1.19048	1.05988	0.150198
K.VIGNGSFGVVYQAK.L [60, 73] (rank 1)	Isoform 1 of Glycogen synthase kinase-3 beta	GSK3B	0.86	1.26				1.06	0.282843
R.QDPDEDISVTAESVR.Q [147, 161] (rank 3)	Mitogen-activated protein kinase kinase kinase 11	MAP3K11	1.06					1.06
R.LTESLDFTDYASR.I [1141, 1153] (rank 3)	Serine/threonine-protein kinase mTOR	MTOR	0.99		1.09	0.961538	1.20482	1.06159	0.110238
R.VMCDSNDLPK.T [200, 209] (rank 1)	Protein kinase-like protein SgK196	POMK			1.06	1.06383		1.06191	0.00270807
R.SFAGNLNTYK.R [385, 394] (rank 2)	6-phosphofructokinase type C	PFKP	1.02	1.23	1.05	0.952381	1.06383	1.06324	0.102645
R.GPPASVAALR.S [145, 154] (rank 1)	Isoform 1 of Breakpoint cluster region protein	BCR	0.87		1.04		1.28205	1.06402	0.207073
K.YEPFLDCALSR.F [647, 657] (rank 1)	Phosphatidylinositol-4,5-bisphosphate 3-kinase catalytic subunit beta isoform	PIK3CB		1	1.13		1.06383	1.06461	0.0650035
K.ELVVTQLGYDTR.V [289, 300] (rank 1)	6-phosphofructokinase type C	PFKP	0.82	1.2	0.92	0.934579	1.44928	1.06477	0.256881
K.LADFGMCK.E [547, 554] (rank 1)	Protein kinase C epsilon type	PRKCE	0.77	0.99	0.85	1.07527	1.63934	1.06492	0.342364
R.EGLIDTAVK.T [844, 852] (rank 3)	DNA-directed RNA polymerase II subunit RPB1	POLR2A	0.92	1.26		1.03093	1.05263	1.06589	0.141846
R.SVEDDEEGHLICQSGDVLSAR.Y [139, 159] (rank 1)	Isoform 1 of Dual specificity protein kinase CLK1	CLK1	0.93				1.20482	1.06741	0.194327
R.TPLPTLNER.D [5, 13] (rank 1)	Isoform 1 of Serine/threonine-protein kinase MARK2	MARK2		0.95	1.11	1.25	0.961538	1.06788	0.141593
R.VLVNDAQK.V [311, 318] (rank 2)	Isoform 1 of Transcription intermediary factor 1-beta	TRIM28	1.02	1.09	1.16	1.02041	1.05263	1.06861	0.058633
K.YGYTHLSAGELLR.D [58, 70] (rank 2)	UMP-CMP kinase isoform a	CMPK1	1.05	0.97	1	1.07527	1.25	1.06905	0.109228
R.DVTEPGALR.M [389, 397] (rank 1)	Isoform 1 of Non-receptor tyrosine-protein kinase TNK1	TNK1	1.06		0.96	1.19048		1.07016	0.115573
K.LCDFGLAR.S [169, 176] (rank 1)	Isoform 3 of Mitogen-activated protein kinase 15	MAPK15	1.04	0.85	1.11	1.17647	1.17647	1.07059	0.135619
K.LVVFDTSLQVK.K [47, 57] (rank 1)	PRKAG1 cDNA FLJ40287 fis, clone TESTI2027909, highly similar to 5'-AMP-ACTIVATED PROTEIN KINASE, GAMMA-1 SUBUNIT	PRKAG1	1.23		0.84	1.14943		1.07314	0.205887
R.TCYIAPER.F [193, 200] (rank 2)	Phosphoinositide 3-kinase regulatory subunit 4	PIK3R4		1.05	1.01	0.970874	1.26582	1.07417	0.131786
R.ALTDYITR.L [3878, 3885] (rank 3)	Isoform 1 of A-kinase anchor protein 9	AKAP9	0.73		1.42			1.075	0.487904
K.WTAPEALR.E [351, 358] (rank 1)	Tyrosine-protein kinase CSK	CSK	1.03		0.94	1.26582		1.07861	0.168262
R.GMEVVQLNLSR.P [34, 44] (rank 2)	Isoform 1 of Inositol-tetrakisphosphate 1-kinase	ITPK1			1.24		0.917431	1.07872	0.228091
K.FVANGIESSIRMEVR.A [683, 697] (missed 1) (rank 1)	Isoform 1 of Obscurin	OBSCN	1.09	1.07				1.08	0.0141421
K.TPVPAQR.E [309, 315] (rank 2)	Isoform 1 of RAF proto-oncogene serine/threonine-protein kinase	RAF1			0.91	1.25		1.08	0.240416
R.GIAQMLEK.Y [92, 99] (rank 1)	Casein kinase II subunit beta	CSNK2B	1.02	1.08	1.25	1.02041	1.03093	1.08027	0.0980547
K.LSYYEYDFER.G [36, 45] (rank 1)	Tyrosine-protein kinase BTK	BTK	1.05	1.03	1.1	1.14943	1.07527	1.08094	0.04647
K.HVYSEAAR.V [322, 329] (rank 1)	N-acetylgalactosamine kinase isoform 2	GALK2	1.08		1.04	1.1236	1.08696	1.08264	0.0342594
K.VLECFHR.R [57, 63] (rank 3)	MAP kinase-activated protein kinase 3	MAPKAPK3	1.54	0.72	1.21	0.862069		1.08302	0.367676
R.SGWALNMK.E [185, 192] (rank 2)	Tyrosine-protein kinase CSK	CSK	0.99	1.18	1.37		0.793651	1.08341	0.247756
K.ILLDSVQLK.D [250, 258] (rank 1)	1-phosphatidylinositol-3-phosphate 5-kinase isoform 3	PIKFYVE	1.01	1.03	1.08	1.16279	1.13636	1.08383	0.0658745
K.YYINVCR.P [808, 814] (rank 1)	Cation-independent mannose-6-phosphate receptor	IGF2R	1.2	0.99		0.763359	1.38889	1.08556	0.269599
K.LNLPPYLTQEAR.D [309, 320] (rank 1)	Isoform Alpha I of Ribosomal protein S6 kinase beta-1	RPS6KB1	0.98	1.32	0.78	1.25	1.0989	1.08578	0.216038
R.LSAYVSYGGLLMR.L [111, 123] (rank 1)	DNA-directed RNA polymerases I, II, and III subunit RPABC3	POLR2H	0.94	1.37	0.79		1.28205	1.09551	0.275477
K.NEMQVLR.K [355, 361] (rank 2)	Putative uncharacterized protein ARAF	ARAF	0.84		1.08	1.11111	1.35135	1.09562	0.209144
R.ATAEALLALPVLR.Q [347, 359] (rank 2)	membrane-associated tyrosine- and threonine-specific cdc2-inhibitory kinase isoform 2	PKMYT1	0.78	1.05		1.44928	1.11111	1.0976	0.275072
K.ELEDLLSPLEELVK.E [401, 414] (rank 3)	Nuclear pore glycoprotein p62	NUP62	1.15	1.17	1.08	1.08696	1.0101	1.09941	0.0633447
K.FSNQETCVEIGESVR.G [34, 48] (rank 1)	Ribose-phosphate pyrophosphokinase 1	PRPS1	1.09	1.07	1.19	1.07527	1.07527	1.10011	0.0508016
K.LLSSYLQK.K [51, 58] (rank 1)	Thymidylate kinase	DTYMK	0.75		1.22	0.925926	1.51515	1.10277	0.336413
R.GVPGQVDFYAR.F [40, 50] (rank 1)	[Pyruvate dehydrogenase [lipoamide]] kinase isozyme 1, mitochondrial	PDK1	1.29		1.19	0.769231	1.16279	1.10301	0.22914
R.YEPVAEIGVGAYGTVYK.A [5, 21] (rank 1)	Cell division protein kinase 4	CDK4	0.84		1.03		1.44928	1.10643	0.311745
K.VENEDEPVR.L [297, 305] (rank 1)	Isoform 2 of Phosphatidylinositol 4-kinase beta	PI4KB	0.61		0.96		1.75439	1.10813	0.586397
R.ILTPENR.K [223, 229] (rank 1)	Isoform Short of Thymidine kinase 2, mitochondrial	TK2			1.11			1.11
K.VIGNGSFGVVYQAR.L [123, 136] (rank 1)	Glycogen synthase kinase-3 alpha	GSK3A	1.35		1.02	1.0989	0.980392	1.11232	0.165931
K.EPAVLMGILGIYK.C [538, 550] (rank 2)	SCY1-like protein 2	SCYL2	0.7		1.27	1.14943	1.33333	1.11319	0.285827
K.FMDASALTGIPLPLIK.S [89, 104] (rank 2)	Cell division protein kinase 2	CDK2	1.33	0.94	1.19	1.08696	1.02041	1.11347	0.15182
K.WNPTAGVAFEYDPDNALR.H [175, 192] (rank 2)	DNA-directed RNA polymerase II subunit RPB3	POLR2C	0.95	1.03	0.89	1.31579	1.38889	1.11494	0.223834
R.DIKPQNLLLDPDTAVLK.L [180, 196] (rank 2)	Isoform 1 of Glycogen synthase kinase-3 beta	GSK3B			1.4	0.833333		1.11667	0.400694
R.NCTIVSPDAGGAK.R [163, 175] (rank 2)	Ribose-phosphate pyrophosphokinase 1	PRPS1	0.94	1.14	1.25	0.980392	1.28205	1.11849	0.154466
K.CTLACQQFR.V [109, 117] (rank 2)	Protein XRP2	RP2	0.82	0.97	0.94	1.49254	1.38095	1.1207	0.296554
K.APPPGLPAETIK.D [106, 117] (rank 3)	Cell division protein kinase 4	CDK4	0.89	0.93	0.94	1.28205	1.5625	1.12091	0.293028
K.ALFPGDSEIDQLFR.I [228, 241] (rank 1)	Cell division protein kinase 3	CDK3	0.99	1.02	0.91	1.35135	1.33333	1.12094	0.206174
R.TYYLMDPSGNAHK.W [521, 533] (rank 1)	Isoform 1 of 3-phosphoinositide-dependent protein kinase 1	PDPK1			1.12	1.1236		1.1218	0.00254241
R.LFPNADSK.A [277, 284] (rank 1)	Mitogen-activated protein kinase 1	MAPK1	1.29	1.07	1.19		0.943396	1.12335	0.149938
K.LLSNDEVTIK.Y [47, 56] (rank 1)	Protein TFG	TFG	1.01	0.83	1.17	1.40845	1.20482	1.12465	0.217365
K.QQFDQEIK.V [227, 234] (rank 2)	Interleukin-1 receptor-associated kinase 4	IRAK4			1.14		1.11111	1.12556	0.0204275
R.DCQLLEHK.E [244, 251] (rank 2)	Isoform Long of Transcription intermediary factor 1-alpha	TRIM24	1.18		1.49	0.833333	1.0101	1.12836	0.279569
K.LLGVIIEEGK.Y [77, 86] (rank 1)	Isoform 1 of Receptor-interacting serine/threonine-protein kinase 1	IRPK1	1.23	1.19	0.87	0.990099	1.36986	1.12999	0.198939
K.ADSEQLAR.S [921, 928] (rank 1)	Rho-associated protein kinase 2	ROCK2	1.13					1.13
K.SELLPTVR.L [1325, 1332] (rank 1)	CAD protein	CAD	1.25	1.1	0.97	1.33333	1.0101	1.13269	0.15539
R.LGLIPLISDDIVDK.L [67, 80] (rank 3)	DNA-directed RNA polymerase II subunit RPB3	POLR2C	0.95		1.21	1.14943	1.23457	1.136	0.129058
R.VPFLVAETPR.A [389, 398] (rank 1)	Isoform 2 of 5'-AMP-activated protein kinase catalytic subunit alpha-1	PRKAA1	1.08	0.98	1.08	1.35135	1.19048	1.13637	0.141378
K.IMEVTAER.L [53, 60] (rank 1)	Phosphorylase b kinase gamma catalytic chain, testis/liver isoform	PHKG2	0.92	1.13	1.18		1.31579	1.13645	0.164268
R.AASPQDLAGGYTSSLACHR.A [276, 294] (rank 1)	CDK-activating kinase assembly factor MAT1	MNAT1			1.14			1.14
K.EAMEHPYFYPVVK.E [317, 329] (rank 2)	Casein kinase II subunit alpha'	CSNK2A2	1.22				1.06383	1.14191	0.110429
K.SLVDIDLSSLR.D [8, 18] (rank 3)	Isoform 1 of Mitogen-activated protein kinase kinase kinase kinase 4	MAP4K4	1.22		1.13	1.1236	1.0989	1.14312	0.0529754
R.LTAALVLR.H [667, 674] (rank 1)	Ribosomal protein S6 kinase alpha-3	RPS6KA3	0.92	1.1	1.58	0.980392	1.14943	1.14596	0.259319
K.ILNEKPTTDEPEK.A [379, 391] (rank 2)	Isoform 1 of STE20-like serine/threonine-protein kinase	SLK			1.24		1.05263	1.14632	0.132489
K.FGVYDIDNK.T [76, 84] (rank 2)	Copine-3	CPNE3	1.16	0.97	1.32	1.17647	1.11111	1.14752	0.126078
R.IGGGPGDAADVQR.H [311, 323] (rank 2)	Ribosomal protein S6 kinase beta-2	RPS6KB2	0.86	1.43	1.06	1.26582	1.1236	1.14788	0.214878
K.FYGELALK.K [155, 162] (rank 3)	Isoform 1 of DNA-dependent protein kinase catalytic subunit	PRKDC	1.05	1.01		1.31579	1.21951	1.14883	0.143658
K.DQYFMQR.H [1028, 1034] (rank 1)	Isoform 1 of STE20-like serine/threonine-protein kinase	SLK	1.18		1.06	1.21951	1.13636	1.14897	0.0683463
R.LLGEGYK.K [960, 966] (rank 1)	Beta-type platelet-derived growth factor receptor	PDGFRB	1.36				0.943396	1.1517	0.294583
K.IFCVHGGLSPSIQTLDQIR.T [159, 177] (rank 1)	Serine/threonine-protein phosphatase 4 catalytic subunit	PPP4C	1.39	1.3	0.76	1.28205	1.03093	1.1526	0.256799
K.VLMLTLQNDPPSLETGVQDK.E [234, 253] (rank 1)	Serine/threonine-protein kinase OSR1	OXSR1	0.8	0.88	0.8	1.20482	2.08333	1.15363	0.545882
K.YSLKPNDQILAEDK.H [30, 43] (rank 2)	Isoform Short of Adenosine kinase	ADK	1.19	1.05	1	1.11111	1.42857	1.15594	0.168106
R.SPEVLLGSAR.Y [176, 185] (rank 3)	Putative uncharacterized protein DKFZp686L20222	CDK1	1.08	1.16	1.11	1.13636	1.2987	1.15701	0.0846347
K.FLILNPSK.R [250, 257] (rank 1)	Isoform 7 of Serine/threonine-protein kinase MARK2	MARK2	0.86		0.6	1.96078	1.23457	1.16384	0.591709
K.LCDFGISGQLVDSIAK.T [255, 270] (rank 1)	Isoform 2 of Dual specificity mitogen-activated protein kinase kinase 4	MAP2K4			1.34	1.25	0.909091	1.16636	0.227304
R.EVLEGLEYLHK.N [128, 138] (rank 2)	Serine/threonine-protein kinase OSR1	OXSR1	1.09	1.38	1.18	1.11111	1.07527	1.16728	0.125504
K.EYSIGTGSTK.Q [140, 149] (rank 1)	Interferon-induced, double-stranded RNA-activated protein kinase	EIF2AK2	1.12		1.14	1.03093	1.38889	1.16995	0.153464
R.IFSNALPDDLR.S [197, 207] (rank 1)	Isoform 1 of Nuclear receptor-binding protein 2	NRBP2		1.17				1.17
R.TTVGVDGSLYK.T [407, 417] (rank 2)	Isoform 1 of Hexokinase-1	HK1	0.89	1.26	1.12	1.2987	1.28205	1.17015	0.171843
R.DYLVSLQHQR.Q [497, 506] (rank 2)	Isoform 1 of TRAF2 and NCK-interacting protein kinase	TNIK	1.5	0.9	1.41	0.943396	1.0989	1.17046	0.271939
R.VTVLGHVQR.G [292, 300] (rank 1)	Isoform 1 of 6-phosphofructokinase, liver type	PFKL	1.3	1.05	1.4	1.06383	1.05263	1.17329	0.165222
K.DQTDFEHR.I [696, 703] (rank 2)	Isoform 2 of 6-phosphofructokinase, muscle type	PFKM	1.24		0.95	1.17647	1.33333	1.17495	0.163219
K.VITVLTR.S [536, 542] (rank 1)	Maternal embryonic leucine zipper kinase	MELK	1.41	1.03	1.27		0.990099	1.17502	0.199552
K.ALDLLDK.M [285, 291] (rank 2)	Mitogen-activated protein kinase 1	MAPK1	1.05	1.11	1.18	1.26582	1.28205	1.17757	0.0994367
R.FGIDDQDYLVSLTR.N [114, 127] (rank 2)	Phosphatidylinositol-5-phosphate 4-kinase type-2 gamma	PIP4K2C	1.01		0.86	1.35135	1.49254	1.17847	0.293446
R.LGQLLLSAK.K [1803, 1811] (rank 1)	Isoform 1 of Serine/threonine-protein kinase ATR	ATR		1.18				1.18
K.LLGNSLLK.L [1577, 1584] (rank 2)	Isoform 1 of Citron Rho-interacting kinase	CIT			1.37	0.990099		1.18005	0.268631
K.VLFYEEELVR.R [693, 702] (rank 3)	Serine/threonine-protein kinase MRCK beta	CDC42BPB			1.07	1.2987		1.18435	0.161716
R.VVLAPQDVVVAR.Y [226, 237] (rank 2)	Isoform 3 of Tyrosine-protein kinase-like 7	PTK7	0.96		1.41			1.185	0.318198
R.ELLLSYLK.N [400, 407] (rank 2)	Isoform 2 of FAST kinase domain-containing protein 1	FASTKD1			1.11	1.23457	1.21951	1.18803	0.0679911
R.FTTEEALR.H [474, 481] (rank 1)	Isoform 1 of Serine/threonine-protein kinase Chk2	CHEK2	1.19					1.19
K.IGLTNLLGAR.L [541, 550] (rank 2)	FAST kinase domain-containing protein 3	FASTKD3	0.93	1.44	1.21			1.19333	0.255408
K.MLNVTAPTPQQLQAFK.N [483, 498] (rank 1)	Serine/threonine-protein kinase B-raf	BRAF			1.39	1.2987	0.900901	1.19653	0.260064
K.LPDGTWNLK.K [397, 405] (rank 1)	Isoform Long of Dual specificity tyrosine-phosphorylation-regulated kinase 1A	DYRK1A			1.67	0.724638		1.19732	0.668472
R.LMMSELENR.R [71, 79] (rank 1)	Adenylate kinase isoenzyme 4, mitochondrial	AK4	1.27	1.06	1.29	1.19048	1.17647	1.19739	0.0911184
R.VLTSVSLGK.E [817, 825] (rank 2)	Isoform 2 of Kinase suppressor of Ras 1	KSR1	1.24	1.16	1.2			1.2	0.04
K.FDVINLAAEK.T [475, 484] (rank 2)	Isoform A of 5'-AMP-activated protein kinase subunit gamma-2	PRKAG2	0.9	1.2	1.24	1.35135	1.31579	1.20143	0.178819
K.DLFAECAK.I [240, 247] (rank 1)	General transcription factor IIH subunit 1	GTF2H1	0.88		1.41	1.38889	1.13636	1.20381	0.249112
R.IISGSPLGSLAR.S [920, 931] (rank 1)	Caspase recruitment domain-containing protein 11	CARD11			1.26	1.14943		1.20471	0.0781881
R.ISINQALQHAFIQEK.I [991, 1005] (rank 2)	Serine/threonine-protein kinase PRP4 homolog	PRPF4B			1.4	1.38889	0.833333	1.20741	0.324005
K.NLETPLCK.N [85, 92] (rank 1)	Isoform 3 of Adenylate kinase 2, mitochondrial	AK2	1.04	1.13	1.19	1.25	1.42857	1.20771	0.145814
K.IQPAPPEEYVPMVK.E [941, 954] (rank 2)	Isoform 1 of Focal adhesion kinase 1	PTK2		1.08	1.59	1.0989	1.06383	1.20818	0.254948
K.LSPPFKPQVTSETDTR.Y [420, 435] (rank 3)	RAC-alpha serine/threonine-protein kinase	AKT1	1.22		1.19	1.13636	1.2987	1.21127	0.0677835
R.AMVASGSELGK.K [51, 61] (rank 2)	Isoform 3 of Adenylate kinase 2, mitochondrial	AK2	1.13	1.21	1.04	1.33333	1.35135	1.21294	0.13271
K.HSVLLSASR.K [565, 573] (rank 2)	Wee1-like protein kinase	WEE1	1.17		1.45		1.03093	1.21698	0.213449
K.AANVLITR.D [151, 158] (rank 1)	Isoform 1 of Cell division protein kinase 9	CDK9	1.43	0.94	0.77	1.69492	1.25	1.21698	0.371281
R.LQAYHTQTTPLIEYYR.K [186, 201] (rank 1)	Isoform 1 of Adenylate kinase 2, mitochondrial	AK2	1	1.27	0.95	1.28205	1.5873	1.21787	0.256192
R.TLFPGTDHIDQLK.L [220, 232] (rank 1)	Isoform CSBP2 of Mitogen-activated protein kinase 14	MAPK14			1.17		1.26582	1.21791	0.0677569
K.VSIAVLR.G [172, 178] (rank 1)	Dual specificity mitogen-activated protein kinase kinase 2	MAP2K2	1.36		1.19	1.04167	1.28205	1.21843	0.136801
R.LESEEEGVPSTAIR.E [38, 51] (rank 2)	Putative uncharacterized protein DKFZp686L20222	CDK1	1.36	1.14	1.17	1.2987	1.1236	1.21846	0.104852
K.LGMPQFLSTEAQSLLR.A [278, 293] (rank 2)	Ribosomal protein S6 kinase alpha-1	RPS6KA1	1.3	1.32	1.2	1.13636	1.13636	1.21855	0.0877204
K.LAVQFTNR.N [696, 703] (rank 1)	FAST kinase domain-containing protein 5	FASTKD5	1.32		0.92	1.53846	1.0989	1.21934	0.268378
K.AQLGEDIR.R [14, 21] (rank 3)	Protein TFG	TFG	0.8	1.21	0.7	1.75439	1.63934	1.22075	0.476528
K.SFLLALPAPLVTPEASAEAR.R [175, 194] (rank 1)	Phosphatidylinositol 3-kinase regulatory subunit beta	PIK3R2				0.854701	1.5873	1.221	0.518027
R.LFQQILSGVDYCHR.H [120, 133] (rank 1)	Protein kinase, AMP-activated, alpha 1 catalytic subunit, isoform CRA_b	PRKAA1	1.24		1.3		1.1236	1.2212	0.0896926
K.DDSNWWQGR.V [197, 205] (rank 2)	55 kDa erythrocyte membrane protein	MPP1	0.98	0.92	1.08	1.51515	1.6129	1.22161	0.319638
K.SDPYLEFHK.Q [158, 166] (rank 1)	Copine-3	CPNE3	1.17	1.26	1.47	1.16279	1.05263	1.22308	0.156395
R.GQVFDVGPR.Y [15, 23] (rank 3)	Mitogen-activated protein kinase 1	MAPK1	1.54	1.23	1.45	0.900901	1	1.22418	0.276377
R.ELLQDIGDTLSR.A [245, 256] (rank 1)	Isoform Beta of Zinc finger protein RFP	TRIM27	1.18		1.01	1.49254		1.22751	0.244752
K.NPQAVLDVLK.F [114, 123] (rank 1)	Isoform 2 of Serine/threonine-protein kinase PAK 3	PAK3	0.7			1.06383	1.92308	1.22897	0.628039
K.LNFILCDK.L [38, 45] (rank 1)	Checkpoint protein HUS1	HUS1	1.05		1.13	1.14943	1.5873	1.22918	0.242593
K.NLENGALQPSDLDR.N [347, 360] (rank 3)	Isoform B of Serine/threonine-protein kinase 24	STK24	1.22	1.31	1.3	1.14943	1.20482	1.23685	0.0676236
K.EGFIPSNYVAK.L [109, 119] (rank 2)	Isoform LYN A of Tyrosine-protein kinase Lyn	LYN	1.29				1.19048	1.24024	0.070374
R.LVPDSDVR.F [433, 440] (rank 1)	Isoform 1 of Hexokinase-1	HK1	1.42	0.99	1.12	1.66667	1.0101	1.24135	0.293338
R.SYSQQLFLALK.L [793, 803] (rank 1)	Serine/threonine-protein kinase PRP4 homolog	PRPF4B	1.15	1.19	1.43	1.28205	1.16279	1.24297	0.116604
R.SLGPVELLLR.G [68, 77] (rank 2)	Isoform 1 of Serine/threonine-protein kinase N1	PKN1	1.13	1.32	1.01	1.36986	1.38889	1.24375	0.166104
R.LQYALTCLR.K [157, 165] (rank 1)	Isoform 2 of Kinase suppressor of Ras 1	KSR1	1.44		1.05			1.245	0.275772
K.VCSICLSR.R [21, 28] (rank 1)	Cell division cycle 7-like protein 1	CDC7	0.86		1.49	1.03093	1.6129	1.24846	0.360269
K.LFIMVMHIR.G [1518, 1526] (rank 1)	Phosphatidylinositol-4-phosphate 3-kinase C2 domain-containing subunit beta	PIK3C2B			1.13	1.36986		1.24993	0.169609
-.MAEVTVPR.V [0, 7] (rank 1)	Isoform 5 of Ninein	NIN	1.15		1.35			1.25	0.141421
K.LPNGVFTPDFQEFVNK.C [332, 347] (rank 2)	Dual specificity mitogen-activated protein kinase kinase 2	MAP2K2	1.07	1.47	1.12	1.23457	1.40845	1.2606	0.174988
K.EIQGFFNIPVDNLR.A [150, 163] (rank 1)	Phosphoribosyl pyrophosphate synthase-associated protein 2	PRPSAP2	1.22	1.15	1.16	1.53846	1.23457	1.26061	0.159598
R.TGPELSQLTALR.S [581, 592] (rank 1)	Serine/threonine-protein kinase LMTK2	LMTK2			1.26		1.26582	1.26291	0.00411733
R.VIQIVLMR.A [67, 74] (rank 2)	Protein kinase C delta type	PRKCD	1.54		1.35		0.900901	1.26363	0.328186
K.TVVVADFGLSR.L [463, 473] (rank 1)	Isoform LIMK2a of LIM domain kinase 2	LIMK2	1.21			1.33333		1.27167	0.0872098
R.EFGLVFQR.K [266, 273] (rank 2)	General transcription factor IIH subunit 4	GTF2H4			1.19	1.53846	1.08696	1.27181	0.236608
K.EIQDLQSR.Q [2085, 2092] (rank 1)	Isoform 1 of Serine/threonine-protein kinase WNK1	WNK1			1.53	1.1236	1.19048	1.28136	0.217912
R.GSPSPASVSSGR.K [258, 269] (rank 1)	Putative uncharacterized protein ARAF	ARAF	1.21			1.36986		1.28993	0.11304
K.MIVEMLR.T [537, 543] (rank 1)	Isoform 1 of Phosphorylase b kinase regulatory subunit alpha, skeletal muscle isoform	PHKA1	1.03		1.15	1.44928	1.53846	1.29193	0.24103
R.VLTSAFSR.A [466, 473] (rank 1)	Isoform 4 of N-terminal kinase-like protein	SCYL1	1.46	1.22	1.46		1.03093	1.29273	0.207997
K.DLLLQVGR.G [404, 411] (rank 1)	Wee1-like protein kinase	WEE1		1.48	1.11			1.295	0.26163
K.IHYLDTTTLIEPAPR.Y [89, 103] (rank 1)	Crk-like protein	CRKL	1.3	1.17	1.41	1.17647	1.42857	1.29701	0.123233
K.KFDEALK.L [334, 340] (missed 1) (rank 1)	Isoform 2 of 6-phosphofructokinase, muscle type	PFKM	0.9				1.69492	1.29746	0.56209
R.LVLLLQYLENLEK.L [349, 361] (rank 1)	Isoform 3 of Serine/threonine-protein kinase SMG1	SMG1		1.61			1	1.305	0.431335
R.ILLNSER.L [520, 526] (rank 2)	Phosphatidylinositol 3-kinase regulatory subunit beta	PIK3R2		1.39	1.52	1.3641	1.0641	1.33455	0.192771
K.IGEGSTGIVCIATVR.S [326, 340] (rank 3)	Isoform 1 of Serine/threonine-protein kinase PAK 4	PAK4	1.16			1.53846	1.35135	1.34994	0.189235
K.ATAPVGGPK.R [14, 22] (rank 1)	Serine/threonine-protein kinase 6	AURKA				1.35135		1.35135
K.EIPLSEILR.I [458, 466] (rank 1)	Isoform 1 of Serine/threonine-protein kinase D3	PRKD3				1.35135		1.35135
K.IGHYILGDTLGVGTFGK.V [14, 30] (rank 2)	Protein kinase, AMP-activated, alpha 1 catalytic subunit, isoform CRA_b	PRKAA1	1.11	1.28	1.7	1.06383	1.6129	1.35335	0.289808
K.IGTQGNVNFGGR.P [261, 272] (rank 1)	Isoform Long of Tyrosine-protein kinase SYK	SYK	1.59	1.13				1.36	0.325269
K.LGEGQFGEVHLCEVDSPQDLVSLDFPLNVR.K [615, 644] (rank 1)	Isoform 1 of Epithelial discoidin domain-containing receptor 1	DDR1	1.44					1.44
R.GWEEGVAQMSVGQR.A [95, 108] (rank 2)	FKBP1A protein	FKBP1A	1.11	1.34	1.57	1.38889	1.40845	1.36347	0.165923
R.VGMIPVPYVEK.L [169, 179] (rank 2)	Crk-like protein	CRKL	1.68	1.47	1.35	1.14943	1.17647	1.36518	0.219369
R.LVLSWADLGPDK.Y [175, 186] (rank 1)	Isoform 1 of PX domain-containing protein kinase-like protein	PXK	1.77		1.62		0.714286	1.3681	0.571161
K.VVLMQCNIESVEEGVK.H [443, 458] (rank 2)	Nuclear receptor-binding protein	NRBP1	1.48		1.45	1.31579	1.23457	1.37009	0.115153
K.IGSFQLFVEGYK.E [252, 263] (rank 1)	Phosphatidylinositol 4-kinase type 2-beta	PI4K2B			1.39			1.39
K.VASEAPLEHKPQVEASSPR.L [852, 870] (rank 2)	Serine/threonine-protein kinase Nek9	NEK9	1.18		1.6			1.39	0.296985
K.LIPDDVMTR.L [64, 72] (rank 1)	GTP:AMP phosphotransferase, mitochondrial	AK3	1.4	1.28	1.41	1.35135	1.5625	1.40077	0.104007
R.FTLGTFLR.L [191, 198] (rank 2)	Isoform 1 of Sphingosine kinase 1	SPHK1			1.08	1.72414		1.40207	0.455474
K.ALSEAQAR.F [252, 259] (rank 1)	Serine/threonine-protein kinase N2	PKN2	1.42				1.38889	1.40444	0.0219989
K.NNPESVEENTTEEK.N [402, 415] (rank 1)	Isoform 1 of Serine/threonine-protein kinase 33	STK33	1.41					1.41
K.DVTFNTNLPDAEILK.M [474, 488] (rank 1)	Isoform 1 of Mitogen-activated protein kinase kinase kinase MLT	ZAK		1.13	0.9	2.17391	1.47059	1.41863	0.555409
R.APSGAVLDYEVK.Y [458, 469] (rank 1)	Ephrin receptor B4	EPHB4	0.72		1.82		1.72414	1.42138	0.6093
K.TSCIIQSILDSR.C [398, 409] (rank 3)	Fucose-1-phosphate guanylyltransferase	FPGT	1.12		1.39	1.88679	1.33333	1.43253	0.324386
K.ISIEGNIAAGK.S [23, 33] (rank 1)	Deoxycytidine kinase	DCK	0.88			2.08333	1.36986	1.4444	0.605119
K.VQVYQEPNR.E [48, 56] (rank 2)	Phosphoribosyl pyrophosphate synthase-associated protein 2	PRPSAP2	1.23	1.24	1.08	1.78571	1.88679	1.4445	0.364945
R.VVECQLETHNR.K [1131, 1141] (rank 2)	Isoform 1 of Serine/threonine-protein kinase WNK1	WNK1	1.73		1.47	1.14943		1.44981	0.290814
R.CSVAPGSVVEYSR.L [410, 422] (rank 2)	Fucose-1-phosphate guanylyltransferase	FPGT	1.65	1.42	1.56	1.23457	1.49254	1.47142	0.157263
K.TVCGVVSR.R [820, 827] (rank 3)	Isoform 1 of Hexokinase-1	HK1	1.19		1.53	1.75439	1.44928	1.48092	0.232972
K.VIEQLGTPSAEFMK.K [236, 249] (rank 1)	Isoform Alpha-2 of Mitogen-activated protein kinase 9	MAPK9	1.28		1.48	1.85185	1.35135	1.4908	0.254531
R.VDPEELFTK.L [13, 21] (rank 2)	Serine/threonine-protein kinase 25	STK25	1.59		1.69	1.21951		1.49984	0.247864
K.SGPLPSAER.L [592, 600] (rank 3)	Isoform 1 of Exosome component 10	EXOSC10	1.65		1.72	1.31579	1.36986	1.51391	0.200827
K.TNLLDELPQSVLK.W [264, 276] (rank 2)	Isoform 1 of Serine/threonine-protein kinase VRK2	VRK2	1.47		1.17	2.32558	1.1236	1.52229	0.557099
R.ILQAVNFPFLVK.L [86, 97] (rank 1)	Isoform 2 of cAMP-dependent protein kinase catalytic subunit alpha	PRKACA			1.38		1.66667	1.52333	0.202704
R.QQVVLENAAK.K [768, 777] (rank 4)	Isoform 1 of Exosome component 10	EXOSC10	1.32	1.43	1.6		1.75439	1.5261	0.190865
K.SVVYQETNGETR.V [36, 47] (rank 2)	Isoform 1 of Phosphoribosyl pyrophosphate synthase-associated protein 1	PRPSAP1	1.35	1.38	1.41	1.85185	1.66667	1.5317	0.218833
K.ICDFDLGSGMK.L [188, 198] (rank 2)	Isoform 2 of MAP kinase-interacting serine/threonine-protein kinase 1	MKNK1	1.41		1.46	1.92308	1.35135	1.53611	0.261773
K.VQIFDLMDAK.A [64, 73] (rank 2)	Serine/threonine-protein kinase Nek7	NEK7	1.27		1.63	2.12766	1.1236	1.53781	0.447108
R.LGHFTTVR.H [320, 327] (rank 1)	Isoform 2 of Serine/threonine-protein kinase tousled-like 1	TLK1				1.53846		1.53846
K.GQPFDVGPR.Y [32, 40] (rank 2)	Mitogen-activated protein kinase 3	MAPK3	1.22	1.58	1.69	1.66667	1.5625	1.54383	0.189062
R.IGQPTLLLYVDAGPETMTQR.L [108, 127] (rank 1)	Adenylate kinase isoenzyme 1	AK1	1.34	1.52	1.22	1.88679	1.75439	1.54424	0.27791
K.LLEAPDVLCLR.L [724, 734] (rank 1)	Ribosomal protein S6 kinase delta-1	RPS6KC1	2.04	1.31	1.29			1.54667	0.427356
K.IMELLGQNEVEQR.Q [42, 54] (rank 1)	DNA-directed RNA polymerase II subunit RPB2	POLR2B	1.78		1.32			1.55	0.325269
K.LCDFGFAK.I [166, 173] (rank 1)	Isoform 1 of MAP kinase-activated protein kinase 5	MAPKAPK5	1.35	1.66	1.84	1.66667	1.25	1.55333	0.244824
K.YLNQFENCCGLR.E [106, 117] (rank 1)	Inhibitor of nuclear factor kappa-B kinase subunit beta	IKBKB	1.45	1.67	2.05	1.35135	1.31579	1.56743	0.302984
R.WYEEEEPQLR.C [160, 169] (rank 2)	nucleoside diphosphate kinase 6	NME6	1.61	1.65	1.57	1.51515	1.51515	1.57206	0.0591513
K.AAHFFSTLK.E [233, 241] (rank 1)	Isoform 1 of Acylglycerol kinase, mitochondrial	AGK	1.36				1.78571	1.57286	0.301025
K.LGFEDVIAEPVTTHSFDK.V [50, 67] (rank 1)	Isoform Alpha of Caveolin-2	CAV2	1.19				1.96078	1.57539	0.545027
K.LTDNLVALK.E [206, 214] (rank 1)	cDNA FLJ16665 fis, clone THYMU2031249, highly similar to SERINE/THREONINE-PROTEIN KINASE PCTAIRE-1	CDK16		1.82	1.49	1.42857		1.57952	0.210511
R.DLKPENLLIDQQGYLQVTDFGFAK.R [175, 198] (rank 1)	CAMP-dependent protein kinase CatalytiC subunit gamma	PRKACG	1.28		1.16	2.08333	1.92308	1.6116	0.459511
R.CAFSIPNNCSGAR.K [179, 191] (rank 1)	cDNA FLJ60070, highly similar to Serine/threonine-protein kinase D2	PRKD2	1.09	2.03			1.72414	1.61471	0.479458
K.STLLLYQSPTTGLFPTK.T [50, 66] (rank 1)	Isoform 4 of Phosphorylase b kinase regulatory subunit beta	PHKB	1.03		1.69	2.08333	1.78571	1.64726	0.444285
K.FADSDQDRDPHR.L [32, 43] (missed 1) (rank 2)	Isoform Alpha of Caveolin-2	CAV2			1.3	2		1.65	0.494975
R.TGLIEVVLR.S [821, 829] (rank 2)	Phosphatidylinositol-4,5-bisphosphate 3-kinase catalytic subunit delta isoform	PIK3CD	1.21		1.49	2.32558		1.67519	0.58039
R.LTGTPPAYLINR.M [237, 248] (rank 1)	Isoform CSBP1 of Mitogen-activated protein kinase 14	MAPK14	1.73			1.81818	1.51515	1.68778	0.155865
K.GSALGTPAAAEPVTPTSK.A [838, 855] (rank 1)	Isoform IA of Tyrosine-protein kinase ABL1	ABL1	2.04		1.28		1.81818	1.71273	0.39082
R.DLQPVGSGAYGAVCSAVDGR.T [28, 47] (rank 1)	Mitogen-activated protein kinase 12	MAPK12	1.72					1.72
R.QTQSDLTIEK.I [206, 215] (rank 2)	Isoform 2 of Serine/threonine-protein kinase tousled-like 2	TLK2	1.12		2.21		1.85185	1.72728	0.555574
R.EVEENGIVLDPLK.A [432, 444] (rank 3)	Isoform 1 of Collagen type IV alpha-3-binding protein	ACTL8	1.64	1.44	2.09	2.08333	1.40845	1.73236	0.335414
K.GAILTTMLVSR.N [301, 311] (rank 1)	Isoform 4 of Calcium/calmodulin-dependent protein kinase type II subunit gamma	CAMK2G	1.5	1.66	2.58	1.5625	1.47059	1.75462	0.467071
R.AYDPDYER.A [255, 262] (rank 1)	Isoform A1 of Tight junction protein ZO-2	TJP2	1.2	2.68	1.67	1.6129	1.72414	1.77741	0.545323
K.IAEGAQQGDPLSR.Y [265, 277] (rank 2)	N-acetyl-D-glucosamine kinase	NAGK	1.22	1.18	1.57	3.0303	1.88679	1.77742	0.757022
K.VAVQAVQAMNR.I [85, 95] (rank 2)	Guanylate kinase	GUK1	1.55		1.62	2.22222		1.79741	0.369562
K.GEMVTILAQSR.A [580, 590] (rank 2)	Isoform A1 of Tight junction protein ZO-2	TJP2	1.6	1.47	1.18	2.08333	2.32558	1.73178	0.465442
R.EQMMNSSISSGSGSLR.T [561, 576] (rank 1)	Isoform 1 of Disks large homolog 1	DLG1	1.68		2.64		1.08696	1.80232	0.783714
K.GADELPYLR.C [405, 413] (rank 4)	Isoform 2 of 6-phosphofructo-2-kinase/fructose-2,6-biphosphatase 2	PFKFB2	1.41	1.78		2.38095	1.75439	1.83133	0.403385
K.GAYCLSVSDFDNAK.G [190, 203] (rank 1)	Isoform 2 of Proto-oncogene tyrosine-protein kinase Src	SRC		2.06	1.83	1.78571	1.92308	1.8997	0.121234
R.YQQDQLVK.E [162, 169] (rank 1)	Isoform 2 of Phosphatidylinositol 3-kinase regulatory subunit gamma	PIK3R3	1.9					1.9
R.SLEPGTPR.W [127, 134] (rank 1)	cDNA FLJ56840, highly similar to Galactokinase	GALK1		1.93	2.25	1.31579	2.12766	1.90586	0.414887
R.TASEINFDK.L [332, 340] (rank 3)	Mitogen-activated protein kinase kinase kinase kinase 5	MAP4K5				1.92308		1.92308
R.SAPLPNDSQAR.S [118, 128] (rank 1)	Phosphatidylinositol-5-phosphate 4-kinase type-2 alpha	PIP4K2A	1.55	1.54	2.72	2	1.81818	1.92564	0.484228
K.QYQLADWR.I [417, 424] (rank 2)	Isoform 1 of Exosome component 10	EXOSC10	1.57		2.46		1.88679	1.97226	0.451114
R.AGDDCFSLR.R [539, 547] (rank 3)	Non-receptor tyrosine-protein kinase TYK2	TYK2			1.8	2.12766	2	1.97589	0.165155
R.VLGMELAGGVPLDQCQGLSQDLR.N [279, 301] (rank 2)	Isoform 2 of Uncharacterized aarF domain-containing protein kinase 4	ADCK4	2					2
K.VEQLFGLGLR.P [1048, 1057] (rank 1)	Activated CDC42 kinase 1	TNK2				2		2
K.LGSPDYVNR.D [173, 181] (rank 3)	6-phosphofructo-2-kinase/fructose-2,6-biphosphatase 4	PFKFB4	2.39			1.92308	1.85185	2.05498	0.292316
K.DKYESLVEK.V [243, 251] (missed 1) (rank 2)	Deoxycytidine kinase	DCK			1.56	2.17391	2.43902	2.05765	0.450899
R.VPVGFYQR.V [1079, 1086] (rank 4)	Phosphorylase b kinase regulatory subunit alpha, liver isoform	PHKA2	1.57		3.06	1.96078	1.81818	2.10224	0.658605
K.VILPQVLLGLR.D [375, 385] (rank 1)	Isoform 1 of Protein-associating with the carboxyl-terminal domain of ezrin	SCYL3		1.54	1.8	2.08333	3.0303	2.11341	0.650288
R.EALEGILIR.G [352, 360] (rank 1)	Phosphorylase b kinase regulatory subunit alpha, liver isoform	PHKA2	1.43	3.35			1.88679	2.22226	1.003
R.VGFYDIEGTLGK.G [16, 27] (rank 1)	Serine/threonine-protein kinase SIK2	SIK2				2.5641		2.5641
R.ACQEQIEAALR.E [241, 251] (rank 1)	G1/S-specific cyclin-D3	CCND3	1.81	4.11	1.83	25	4.34783	7.41957	9.90165
K.LSASSEDISER.L [919, 929] (rank 3)	Mitogen-activated protein kinase kinase kinase 1	MAP3K1			2.88			2.88
R.GLILDLLDK.L [281, 289] (rank 1)	Mitogen-activated protein kinase kinase kinase kinase 1	MAP4K1				3.33333		3.33333
R.HSLDQDLLR.E [654, 662] (rank 1)	Isoform 2 of Serine/threonine-protein kinase TAO2	TAOK2	2.06		4.61			3.335	1.80312
K.VTSQVLGLGINGK.V [64, 76] (rank 2)	Isoform 1 of MAP kinase-activated protein kinase 2	MAPKAPK2			4.19	1.35135	1.1236	2.22165	1.70844

## Sheet: Commonly Quantified Kinases
Kinases	PRM Ratio	MRM Ratio
MAP4K1	3.33333	0.715923
MAP3K1	2.88	0.650018
TAOK2	3.335	0.752978
EXOSC10	1.67076	0.519792
ABL1	1.71273	0.542319
TJP2	1.7576	0.581593
NEK7	1.53781	0.574726
MAP3K7	1.03385	0.399561
TBRG4	0.905621	0.355849
MAPKAPK2	2.22	0.90487
MAP4K5	1.92308	0.815065
PRKACG	1.6116	0.722561
CAMK2G	1.75462	0.793671
CIT	1.18005	0.540531
VRK1	1.01611	0.466612
TK1	1.05355	0.485582
DCK	1.75102	0.818218
IKBKB	1.56743	0.734645
PI4K2B	1.39	0.653237
SMG1	1.305	0.613551
AURKA	1.35135	0.645234
PIP4K2A	1.92564	0.931585
CAD	1.04173	0.506229
AKT1	1.21127	0.599145
PFKL	1.17329	0.619326
PIK3CD	1.67519	0.893632
PTK2	1.20818	0.648625
SYK	1.36	0.732871
BRAF	1.19653	0.651506
GALK1	1.90586	1.04182
CHEK1	0.909809	0.497549
MELK	1.17502	0.643693
YES1	0.99505	0.548521
GSK3B	1.08833	0.615025
ABL2	0.92885	0.542319
OXSR1	1.16045	0.681056
PRKDC	1.14883	0.677363
TRIM28	1.05353	0.623835
OBSCN	1.08	0.641577
AURKB	0.98	0.583581
AGK	1.57286	0.943685
STK38L	0.996915	0.600019
AKT2	0.948182	0.575775
GSK3A	1.07524	0.654236
GAK	1.04948	0.640338
PRKD2	1.61471	0.98551
IRAK1	0.984114	0.601057
NAGK	1.77742	1.09412
PRKAA1	1.23697	0.762744
PRPS1	1.1093	0.687385
PLK1	0.91	0.566143
TLK2	1.72728	1.08005
ZAK	1.41863	0.893084
STK3	1.00672	0.635359
CAMKK2	0.93548	0.599102
TLK1	1.53846	0.986795
PKN2	1.22469	0.78806
EIF2AK2	1.16995	0.752887
PRKCI	0.94	0.605545
MAP3K4	1.05523	0.686806
MAP3K11	1.06	0.690079
TAOK1	0.943788	0.615823
CHEK2	1.19	0.776824
PFKP	1.06401	0.699104
PRPSAP2	1.35255	0.89262
DDR1	1.44	0.96972
PKMYT1	1.0976	0.775159
AK1	1.54424	1.09766
PXK	1.3681	0.976933
CRKL	1.33109	0.951181
CLK1	1.06741	0.765381
PIP4K2C	1.17847	0.84726
STK33	1.41	1.02046
POLR2B	1.27605	0.926312
VRK2	1.52229	1.106
LMTK2	1.26291	0.918247
MAP2K7	0.84824	0.623198
STK24	1.23685	0.909864
PRPF4B	1.22519	0.904463
LATS1	0.733889	0.548502
PI4KB	1.0408	0.779005
PFKM	1.2362	0.931178
GRK6	0.957741	0.722577
AK2	1.21284	0.918825
PRKCD	1.26363	0.966661
NEK9	1.39	1.06488
ADK	1.15594	0.890853
PHKG2	1.02108	0.793536
PDK1	1.10301	0.872907
MAPK14	1.31025	1.04811
ROCK2	1.13	0.906453
CSNK2A2	1.14191	0.916462
PDPK1	1.08704	0.872907
CDK2	1.11347	0.89435
STK11	1.005	0.809583
SRC	1.8997	1.53138
LIMK2	1.12826	0.918247
CDK9	1.21698	0.997298
UCK2	0.647076	0.533409
ARAF	1.19277	0.997536
POLR2E	0.942078	0.794086
BTK	1.05062	0.891839
CHUK	0.91	0.774576
SLK	1.14764	0.978193
CPNE3	1.1853	1.02623
IRAK4	1.12556	0.984044
RAF1	1.02464	0.8974
IGF2R	1.08556	0.966102
MAP2K4	1.16636	1.04031
CDK7	0.97119	0.868265
MTOR	1.05931	0.953087
PRKCE	1.06492	0.962338
PRPK	0.987158	0.898827
MAP2K1	0.995202	0.908174
TTBK2	0.932525	0.857084
TRIM24	1.12836	1.0452
BRD2	0.998986	0.925639
RPS6KC1	1.54667	1.43513
ILK	0.942466	0.875324
PRKAG1	1.07314	1.00209
CLK3	1.03	0.975276
EPHB4	1.16124	1.10213
POLR2A	1.06589	1.01228
AAK1	0.913327	0.872645
MARK2	1.11586	1.06831
ERCC2	0.978176	0.94541
TBK1	1.05746	1.03326
MASTL	0.99819	0.979937
ITPK1	1.00841	0.990619
PIK3C2A	0.934105	0.929728
IPPK	0.886366	0.899863
LYN	1.10578	1.13553
CSK	1.05874	1.08725
MAPKAPK3	1.08302	1.11367
SRPK2	1.05988	1.09595
PTK7	1.185	1.22799
CMPK1	1.05569	1.10329
FGFR4	0.95	0.994338
PAK2	1.00551	1.05512
IKBKAP	0.974506	1.02381
PRPS2	0.978766	1.0359
ATR	1.18	1.25638
PPP4C	1.1526	1.23777
BRSK2	0.9	1.00145
CSNK1A1	0.918066	1.03059
MAPK15	1.07059	1.20443
CDC42BPB	1.07718	1.24066
CDC42BPG	1.05667	1.24066
CDK12	0.862319	1.01823
SCYL2	1.11319	1.32302
CDC42BPA	1.03537	1.24066
CSNK2A1	0.965483	1.17529
SRPK1	0.837007	1.09085
PRKACA	1.52333	2.00143
PRKAG2	1.20143	1.60701
PBK	0.58625	0.927948
TNK1	1.07016	1.83588
RPS6KB1	1.08578	1.88328
RIPK2	0.42	0.887663
BCKDK	0.37	0.93082
